# Supplementary material
Source: PubMed Central journal article supplement (PMC2747790)

# Phosphine-Catalyzed Enantioselective Synthesis of Oxygen Heterocycles

Ying Kit Chung and Gregory C. Fu\*

*Department of Chemistry, Massachusetts Institute of Technology, Cambridge, Massachusetts  
02139*

## Supporting Information

### Table of Contents

|                                                                    |     |
|--------------------------------------------------------------------|-----|
| I. Phosphine-Catalyzed Asymmetric Synthesis of Oxygen Heterocycles | S-1 |
| II. Determination of Absolute Configuration                        | S-9 |

### I. Phosphine-Catalyzed Asymmetric Synthesis of Oxygen Heterocycles

**General Procedure: Table 2.** In a glove box, a solution of catalyst (S)-1<sup>1</sup> (17.7 mg, 0.050 mmol) in THF (2.0 mL) was added to a mixture of the hydroxy-2-alkynoate (0.50 mmol) and benzoic acid (31 mg, 0.25 mmol) in a 4-mL vial. The vial was sealed with a cap and removed from the glove box. The reaction mixture was placed in an oil bath and stirred at 55 °C for 2 days. Next, the mixture was passed through a small column of silica gel (0.5 cm x 3 cm), which was washed with Et<sub>2</sub>O. The solvents were removed, and the residue was purified by flash chromatography.

**General Procedure: Table 3.** In a glove box, a solution of catalyst (S)-1 (17.7 mg, 0.050 mmol) in cyclopentyl methyl ether (2.0 mL) was added to a mixture of the hydroxy-2-ynoate (0.50 mmol) and 2-bromobenzoic acid (50 mg, 0.25 mmol) in a 4-mL vial. The vial was sealed with a cap and removed from the glove box. The reaction mixture was placed in an oil bath and stirred at 50 °C for 3 days. Next, the mixture was passed through a small column of silica gel (0.5 cm x 3 cm), which was washed with Et<sub>2</sub>O. The solvents were removed, and the residue was purified by flash chromatography.

We have found the use of a glove box to be convenient, but not necessary.

**Procedure without a Glove Box (Table 3, entry 1).** A solution of catalyst (S)-1 (17.7 mg, 0.050 mmol) in cyclopentyl methyl ether (2.0 mL) under argon was added by syringe to a mixture of the hydroxy-2-alkynoate (116 mg, 0.50 mmol) and 2-bromobenzoic acid (50 mg, 0.25 mmol) in a 4-mL vial under argon. The vial was flushed with argon and sealed with a cap. The solution was stirred at 50 °C for 3 days,

---

(1) Zhu, S.-F.; Yang, Y.; Wang, L.-X.; Liu, B.; Zhou, Q.-L. *Org. Lett.* **2005**, *7*, 2333–2335.

and then it was passed through a small column of silica gel (0.5 cm x 3 cm), which was washed with Et<sub>2</sub>O. The solvents were removed, and the residue was purified by flash chromatography, which furnished the desired product as a colorless oil (101 mg, 87%; 87% ee).

**Notes on the stability of catalyst 1:** After exposure of solid **1** to the air for three days at room temperature, no phosphine oxide is observed by <sup>1</sup>H NMR spectroscopy.

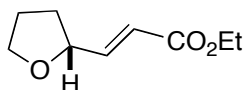

**(R,E)-Ethyl 3-(tetrahydrofuran-2-yl)prop-2-enoate (Table 2, entry 1).** The title compound was prepared according to the General Procedure with ethyl 7-hydroxy-2-heptynoate (85 mg, 0.50 mmol). After purification by flash chromatography (5:20:75 Et<sub>2</sub>O/CH<sub>2</sub>Cl<sub>2</sub>/hexanes), the desired product was isolated as a colorless oil: run 1, 69 mg (82%; 87% ee); run 2, 64 mg (75%; 87% ee).

$R_f = 0.2$  (5:20:75 Et<sub>2</sub>O/CH<sub>2</sub>Cl<sub>2</sub>/hexanes);

$[\alpha]_D^{20} = -1.2$  ( $c$  1.0, CHCl<sub>3</sub>);

<sup>1</sup>H NMR (CDCl<sub>3</sub>, 400 MHz)  $\delta$  6.91 (dd,  $J = 4.8, 15.6$  Hz, 1H), 6.01 (dd,  $J = 1.6, 15.6$  Hz, 1H), 4.54-4.49 (m, 1H), 4.19 (q,  $J = 7.2$  Hz, 2H), 3.96-3.91 (m, 1H), 3.86-3.81 (m, 1H), 2.17-2.09 (m, 1H), 1.96-1.89 (m, 2H), 1.74-1.65 (m, 1H), 1.28 (t,  $J = 7.2$  Hz, 3H);

<sup>13</sup>C NMR (CDCl<sub>3</sub>, 100 MHz)  $\delta$  166.7, 148.6, 120.3, 77.6, 68.7, 60.5, 31.7, 25.7, 14.4;

IR (film) 2980, 2874, 1721, 1660, 1449, 1369, 1300, 1265, 1167, 1097, 1043 cm<sup>-1</sup>;

GCMS (EI) calcd for C<sub>9</sub>H<sub>14</sub>O<sub>3</sub> 170 [M]<sup>+</sup>, found 170.

The enantiomeric excess was determined by chiral GC analysis: Chiraldex G-TA column (100 °C, hold 45 min, then 5 °C/min to 180 °C, hold 5 min; 1.0 mL/min),  $t_r$  (major) 38.5 min,  $t_r$  (minor) 40.3 min.

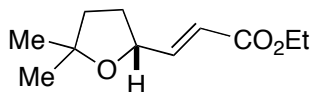

**(R,E)-Ethyl 3-(5,5-dimethyltetrahydrofuran-2-yl)prop-2-enoate (Table 2, entry 2).**

The title compound was prepared according to the General Procedure with ethyl 7-hydroxy-7-methyl-2-octynoate (99 mg, 0.50 mmol). After purification by flash chromatography (5:20:75 Et<sub>2</sub>O/CH<sub>2</sub>Cl<sub>2</sub>/hexanes), the desired product was isolated as a colorless oil: run 1, 92 mg (93%; 94% ee); run 2, 87 mg (88%; 94% ee).

$R_f = 0.2$  (5:20:75 Et<sub>2</sub>O/CH<sub>2</sub>Cl<sub>2</sub>/hexanes);

$[\alpha]_D^{20} = +21$  ( $c$  2.0, CHCl<sub>3</sub>);

<sup>1</sup>H NMR (CDCl<sub>3</sub>, 400 MHz)  $\delta$  6.93 (dd,  $J = 5.2, 15.6$  Hz, 1H), 6.03 (dd,  $J = 1.2, 15.2$  Hz, 1H), 4.61-4.56 (m, 1H), 4.19 (q,  $J = 6.8$  Hz, 2H), 2.25-2.16 (m, 1H), 1.83-1.75 (m, 3H), 1.30-1.27 (m, 9H);

$^{13}\text{C}$  NMR ( $\text{CDCl}_3$ , 100 MHz)  $\delta$  166.8, 149.4, 120.1, 82.1, 77.4, 60.5, 38.3, 32.3, 29.0, 28.3, 14.4;

IR (film) 2972, 2872, 1722, 1660, 1463, 1368, 1298, 1267, 1163, 1099, 1044  $\text{cm}^{-1}$ ;

GCMS (EI) calcd for  $\text{C}_{11}\text{H}_{18}\text{O}_3$  198  $[\text{M}]^+$ , found 198.

The enantiomeric excess was determined by chiral GC analysis: Chiraldex G-TA column (110  $^\circ\text{C}$ , hold 50 min, then 10  $^\circ\text{C}/\text{min}$  to 180  $^\circ\text{C}$ , hold 2 min; 1.0 mL/min),  $t_r$  (minor) 27.4 min,  $t_r$  (major) 29.8 min.

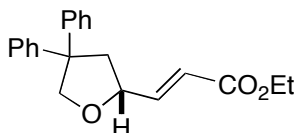

**(*R,E*)-Ethyl 3-(4,4-diphenyltetrahydrofuran-2-yl)prop-2-enoate (Table 2, entry 3).**

The title compound was prepared according to the General Procedure with ethyl 7-hydroxy-6,6-diphenyl-2-heptynoate (161 mg, 0.50 mmol). After purification by flash chromatography (5:20:75  $\text{Et}_2\text{O}/\text{CH}_2\text{Cl}_2/\text{hexanes}$ ), the desired product was isolated as a colorless oil: run 1, 98 mg (61%; 87% ee); run 2, 104 mg (65%; 87% ee).

$R_f$  = 0.2 (5:20:75  $\text{Et}_2\text{O}/\text{CH}_2\text{Cl}_2/\text{hexanes}$ );

$[\alpha]_D^{20}$  = +110 ( $c$  1.0,  $\text{CHCl}_3$ );

$^1\text{H}$  NMR ( $\text{CDCl}_3$ , 400 MHz)  $\delta$  7.35-7.19 (m, 10H), 6.99 (dd,  $J$  = 5.2, 15.6 Hz, 1H), 6.08 (dd,  $J$  = 1.6, 15.6 Hz, 1H), 4.75 (d,  $J$  = 8.8 Hz, 1H), 4.65-4.59 (m, 1H), 4.21 (q,  $J$  = 7.2 Hz, 2H), 4.16 (d,  $J$  = 8.8 Hz, 1H), 2.73 (dd,  $J$  = 6.4, 11.6 Hz, 1H), 2.50 (dd,  $J$  = 10.0, 12.0 Hz, 1H), 1.30 (t,  $J$  = 7.2 Hz, 3H);

$^{13}\text{C}$  NMR ( $\text{CDCl}_3$ , 100 MHz)  $\delta$  166.5, 147.9, 145.6, 144.9, 128.7, 128.6, 127.22, 127.17, 126.8, 126.7, 120.6, 77.4, 77.3, 60.6, 56.2, 44.8, 14.4;

IR (film) 2980, 2871, 1717, 1660, 1494, 1447, 1368, 1299, 1273, 1175, 1042  $\text{cm}^{-1}$ ;

GCMS (EI) calcd for  $\text{C}_{21}\text{H}_{22}\text{O}_3$  322  $[\text{M}]^+$ , found 322.

The enantiomeric excess was determined by chiral HPLC analysis: Chiralpak AD-H column (2% *i*-PrOH:hexanes, 1.0 mL/min),  $t_r$  (major) 14.2 min,  $t_r$  (minor) 18.1 min.

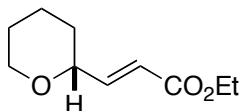

**(*R,E*)-Ethyl 3-(tetrahydro-2H-pyran-2-yl)prop-2-enoate (Table 2, entry 4).** The title compound was prepared according to the General Procedure with ethyl 8-hydroxy-2-octynoate (92 mg, 0.50 mmol). After purification by flash chromatography (5:20:75  $\text{Et}_2\text{O}/\text{CH}_2\text{Cl}_2/\text{hexanes}$ ), the desired product was isolated as a colorless oil: run 1, 82 mg (89%; 93% ee); run 2, 84 mg (91%; 92% ee).

$R_f$  = 0.2 (5:20:75  $\text{Et}_2\text{O}/\text{CH}_2\text{Cl}_2/\text{hexanes}$ );

$[\alpha]_D^{20} = +22$  (*c* 1.0, CHCl<sub>3</sub>);

<sup>1</sup>H NMR (CDCl<sub>3</sub>, 400 MHz) δ 6.87 (dd, *J* = 4.4, 16.0 Hz, 1H), 6.00 (dd, *J* = 2.0, 15.6 Hz, 1H), 4.18 (q, *J* = 7.2 Hz, 2H), 4.05-4.01 (m, 1H), 3.97-3.93 (m, 1H), 3.52-3.45 (m, 1H), 1.89-1.85 (m, 1H), 1.73-1.69 (m, 1H), 1.61-1.49 (m, 3H), 1.39-1.30 (m, 1H), 1.27 (t, *J* = 7.2 Hz, 3H);

<sup>13</sup>C NMR (CDCl<sub>3</sub>, 100 MHz) δ 166.8, 148.3, 119.9, 76.3, 68.4, 60.4, 31.5, 25.8, 23.5, 14.4;

IR (film) 2939, 2850, 1721, 1661, 1441, 1367, 1304, 1275, 1208, 1172, 1082, 1047 cm<sup>-1</sup>;

GCMS (EI) calcd for C<sub>10</sub>H<sub>16</sub>O<sub>3</sub> 184 [M]<sup>+</sup>, found 184.

The enantiomeric excess was determined by chiral GC analysis: Chiraldex G-TA column (103 °C, hold 70 min, then 10 °C/min to 180 °C, hold 2 min; 1.0 mL/min), *t*<sub>r</sub> (major) 56.8 min, *t*<sub>r</sub> (minor) 58.5 min.

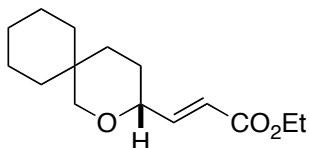

**(*R,E*)-Ethyl 3-(2-oxaspiro[5.5]undecan-3-yl)prop-2-enoate (Table 2, entry 5).** The title compound was prepared according to the General Procedure with ethyl 6-(1-(hydroxymethyl)cyclohexyl)hex-2-ynoate (126 mg, 0.50 mmol). After purification by flash chromatography (5:20:75 Et<sub>2</sub>O/CH<sub>2</sub>Cl<sub>2</sub>/hexanes), the desired product was isolated as a colorless oil: run 1, 104 mg (83%; 94% ee); run 2, 109 mg (87%; 94% ee).

*R*<sub>f</sub> = 0.2 (5:20:75 Et<sub>2</sub>O/CH<sub>2</sub>Cl<sub>2</sub>/hexanes);

$[\alpha]_D^{20} = +59$  (*c* 1.0, CHCl<sub>3</sub>);

<sup>1</sup>H NMR (CDCl<sub>3</sub>, 400 MHz) δ 6.91 (dd, *J* = 4.4, 15.6 Hz, 1H), 6.02 (dd, *J* = 1.6, 15.6 Hz, 1H), 4.18 (q, *J* = 7.2 Hz, 2H), 3.92-3.87 (m, 1H), 3.81 (dd, *J* = 2.4, 11.2 Hz, 1H), 3.14 (d, *J* = 11.2 Hz, 1H), 1.82-1.78 (m, 1H), 1.57-1.42 (m, 11H), 1.28 (t, *J* = 7.2 Hz, 3H), 1.16-1.14 (m, 2H);

<sup>13</sup>C NMR (CDCl<sub>3</sub>, 100 MHz) δ 166.9, 148.2, 120.1, 76.9, 60.5, 36.5, 32.2, 31.2, 27.2, 26.9, 21.61, 21.58, 14.4;

IR (film) 2925, 2850, 1722, 1662, 1453, 1367, 1304, 1172, 1053 cm<sup>-1</sup>;

GCMS (EI) calcd for C<sub>15</sub>H<sub>24</sub>O<sub>3</sub> 252 [M]<sup>+</sup>, found 252.

The enantiomeric excess was determined by chiral HPLC analysis: Chiralpak AS-H column (1% *i*-PrOH:hexanes, 1.0 mL/min), *t*<sub>r</sub> (major) 5.1 min, *t*<sub>r</sub> (minor) 7.4 min.

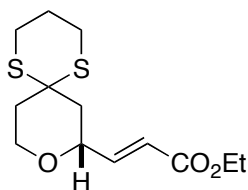

**(*R,E*)-Ethyl 3-(9-oxa-1,5-dithiaspiro[5.5]undecan-8-yl)prop-2-enoate (Table 2, entry 6).** The title compound was prepared according to the General Procedure with ethyl 5-(2-(2-hydroxyethyl)-1,3-dithian-2-yl)pent-2-ynoate (144 mg, 0.50 mmol). After purification by flash chromatography (10:20:70 Et<sub>2</sub>O/CH<sub>2</sub>Cl<sub>2</sub>/hexanes), the desired product was isolated as a colorless oil: run 1, 108 mg (75%; 92% ee); run 2, 99 mg (69%; 92% ee).

$R_f = 0.3$  (10:20:70 Et<sub>2</sub>O/CH<sub>2</sub>Cl<sub>2</sub>/hexanes);

$[\alpha]_D^{20} = -2.1$  ( $c$  1.0, CHCl<sub>3</sub>);

<sup>1</sup>H NMR (CDCl<sub>3</sub>, 400 MHz)  $\delta$  6.86 (dd,  $J = 4.4, 15.6$  Hz, 1H), 6.05 (dd,  $J = 1.6, 15.6$  Hz, 1H), 4.45-4.40 (m, 1H), 4.19 (q,  $J = 7.2$  Hz, 2H), 3.96-3.88 (m, 2H), 2.97-2.75 (m, 4H), 2.36 (td,  $J = 2.0, 14.0$  Hz, 1H), 2.17-2.13 (m, 1H), 2.06-1.93 (m, 3H), 1.71 (dd,  $J = 11.6, 13.6$  Hz, 1H), 1.28 (t,  $J = 7.2$  Hz, 3H);

<sup>13</sup>C NMR (CDCl<sub>3</sub>, 100 MHz)  $\delta$  166.5, 146.9, 120.9, 71.7, 63.4, 60.6, 47.5, 42.6, 37.6, 26.0, 25.9, 25.8, 14.4;

IR (film) 2952, 2864, 1715, 1660, 1424, 1367, 1305, 1178, 1077, 1034 cm<sup>-1</sup>;

GCMS (EI) calcd for C<sub>13</sub>H<sub>20</sub>O<sub>3</sub>S<sub>2</sub> 288 [M]<sup>+</sup>, found 288.

The enantiomeric excess was determined by chiral HPLC analysis: Chiralpak AD-H column (3% *i*-PrOH:hexanes, 1.0 mL/min),  $t_r$  (minor) 15.0 min,  $t_r$  (major) 19.0 min.

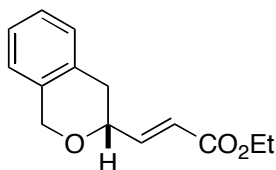

**(*R,E*)-Ethyl 3-(isochroman-3-yl)prop-2-enoate (Table 2, entry 7).** The title compound was prepared according to the General Procedure with ethyl 5-(2-(hydroxymethyl)phenyl)pent-2-ynoate (116 mg, 0.50 mmol). After purification by flash chromatography (5:20:75 Et<sub>2</sub>O/CH<sub>2</sub>Cl<sub>2</sub>/hexanes), the desired product was isolated as a colorless oil: run 1, 96 mg (83%; 94% ee); run 2, 95 mg (82%; 94% ee).

$R_f = 0.2$  (5:20:75 Et<sub>2</sub>O/CH<sub>2</sub>Cl<sub>2</sub>/hexanes);

$[\alpha]_D^{20} = +150$  ( $c$  1.0, CHCl<sub>3</sub>);

<sup>1</sup>H NMR (CDCl<sub>3</sub>, 400 MHz)  $\delta$  7.21-7.02 (m, 5H), 6.17 (dd,  $J = 1.6, 15.6$  Hz, 1H), 4.94 (d,  $J = 15.2$  Hz, 1H), 4.88 (d,  $J = 15.2$  Hz, 1H), 4.41-4.36 (m, 1H), 4.23 (q,  $J = 7.2$  Hz, 2H), 2.85 (d,  $J = 7.2$  Hz, 2H), 1.32 (t,  $J = 7.2$  Hz, 3H);

<sup>13</sup>C NMR (CDCl<sub>3</sub>, 100 MHz)  $\delta$  166.6, 146.8, 134.3, 132.4, 129.0, 126.8, 126.5, 124.4, 121.1, 73.4, 68.2, 60.7, 33.5, 14.4;

IR (film) 2981, 2837, 1721, 1663, 1449, 1367, 1304, 1274, 1176, 1119, 1059, 1037  $\text{cm}^{-1}$ ;  
GCMS (EI) calcd for  $\text{C}_{14}\text{H}_{16}\text{O}_3$  232  $[\text{M}]^+$ , found 232.

The enantiomeric excess was determined by chiral HPLC analysis: Chiralcel OD-H column (2% *i*-PrOH:hexanes, 1.0 mL/min),  $t_r$  (minor) 12.3 min,  $t_r$  (major) 14.5 min.

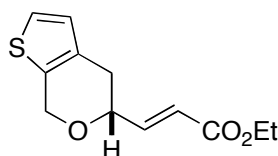

**(*R,E*)-Ethyl 3-(5,7-dihydro-4*H*-thieno[2,3-*c*]pyran-5-yl)prop-2-enoate (Table 2, entry 8).** The title compound was prepared according to the General Procedure with ethyl 5-(2-(hydroxymethyl)thiophen-3-yl)pent-2-ynoate (119 mg, 0.50 mmol). After purification by flash chromatography (5:20:75  $\text{Et}_2\text{O}/\text{CH}_2\text{Cl}_2/\text{hexanes}$ ), the desired product was isolated as a colorless oil: run 1, 93 mg (78%; 91% ee); run 2, 97 mg (82%; 91% ee).

$R_f = 0.2$  (5:20:75  $\text{Et}_2\text{O}/\text{CH}_2\text{Cl}_2/\text{hexanes}$ );

$[\alpha]_D^{20} = +160$  ( $c$  1.0,  $\text{CHCl}_3$ );

$^1\text{H}$  NMR ( $\text{CDCl}_3$ , 400 MHz)  $\delta$  7.18 (d,  $J = 4.8$  Hz, 1H), 7.04 (dd,  $J = 4.0, 15.6$  Hz, 1H), 6.82 (d,  $J = 4.8$  Hz, 1H), 6.17 (dd,  $J = 2.0, 16.0$  Hz, 1H), 4.99 (d,  $J = 14.4$  Hz, 1H), 4.89 (d,  $J = 14.8$  Hz, 1H), 4.38-4.33 (m, 1H), 4.23 (q,  $J = 7.2$  Hz, 2H), 2.84-2.79 (m, 1H), 2.72-2.65 (m, 1H), 1.31 (t,  $J = 7.2$  Hz, 3H);

$^{13}\text{C}$  NMR ( $\text{CDCl}_3$ , 100 MHz)  $\delta$  166.6, 146.5, 132.5, 132.4, 126.9, 123.3, 121.2, 73.3, 65.8, 60.7, 31.3, 14.4;

IR (film) 2980, 2924, 2848, 1720, 1663, 1559, 1445, 1394, 1367, 1304, 1287, 1176, 1100, 1034  $\text{cm}^{-1}$ ;

GCMS (EI) calcd for  $\text{C}_{12}\text{H}_{14}\text{O}_3\text{S}$  238  $[\text{M}]^+$ , found 238.

The enantiomeric excess was determined by chiral HPLC analysis: Chiralcel OD-H column (2% *i*-PrOH:hexanes, 1.0 mL/min),  $t_r$  (minor) 13.9 min,  $t_r$  (major) 16.7 min.

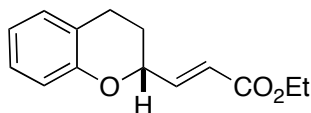

**(*R,E*)-Ethyl 3-(chroman-2-yl)prop-2-enoate (Table 3, entry 1).** The title compound was prepared according to the General Procedure with ethyl 6-(2-hydroxyphenyl)hex-2-ynoate (116 mg, 0.50 mmol). After purification by flash chromatography (5:20:75  $\text{Et}_2\text{O}/\text{CH}_2\text{Cl}_2/\text{hexanes}$ ), the desired product was isolated as a colorless oil: run 1, 99 mg (85%; 89% ee); run 2, 100 mg (86%; 88% ee).

$R_f = 0.3$  (5:20:75  $\text{Et}_2\text{O}/\text{CH}_2\text{Cl}_2/\text{hexanes}$ );

$[\alpha]_D^{20} = -1.0$  ( $c$  3.0,  $\text{CHCl}_3$ );

$^1\text{H}$  NMR ( $\text{CDCl}_3$ , 400 MHz)  $\delta$  7.15-7.11 (m, 1H), 7.07-7.00 (m, 2H), 6.89-6.86 (m, 2H), 6.18 (dd,  $J = 2.0, 16.0$  Hz, 1H), 4.78-4.74 (m, 1H), 4.22 (q,  $J = 7.2$  Hz, 2H), 2.92-2.74 (m, 2H), 2.19-2.12 (m, 1H), 1.92-1.83 (m, 1H), 1.31 (t,  $J = 6.0$  Hz, 3H);

$^{13}\text{C}$  NMR ( $\text{CDCl}_3$ , 100 MHz)  $\delta$  166.5, 154.0, 146.3, 129.7, 127.6, 121.6 (2), 120.7, 116.9, 74.1, 60.7, 27.1, 24.1, 14.4;

IR (film) 2921, 2850, 1717, 1663, 1583, 1489, 1457, 1367, 1257, 1177  $\text{cm}^{-1}$ ;

GCMS (EI) calcd for  $\text{C}_{14}\text{H}_{16}\text{O}_3$  232  $[\text{M}]^+$ , found 232.

The enantiomeric excess was determined by chiral HPLC analysis: Chiralcel OD-H column (1% *i*-PrOH:hexanes, 1.0 mL/min),  $t_r$  (minor) 7.2 min,  $t_r$  (major) 9.0 min.

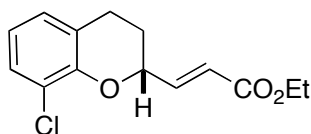

**(*R,E*)-Ethyl 3-(8-chlorochroman-2-yl)prop-2-enoate (Table 3, entry 2).** The title compound was prepared according to the General Procedure with ethyl 6-(3-chloro-2-hydroxyphenyl)hex-2-ynoate (133 mg, 0.50 mmol). After purification by flash chromatography (3:20:77  $\text{Et}_2\text{O}/\text{CH}_2\text{Cl}_2/\text{hexanes}$ ), the desired product was isolated as a colorless oil: run 1, 110 mg (83%; 63% ee); run 2, 107 mg (80%; 63% ee).

$R_f = 0.3$  (3:20:77  $\text{Et}_2\text{O}/\text{CH}_2\text{Cl}_2/\text{hexanes}$ );

$[\alpha]_D^{20} = +34$  ( $c$  1.0,  $\text{CHCl}_3$ );

$^1\text{H}$  NMR ( $\text{CDCl}_3$ , 400 MHz)  $\delta$  7.22-7.20 (m, 1H), 7.02 (dd,  $J = 3.6, 15.6$  Hz, 1H), 6.97-6.95 (m, 1H), 6.80 (t,  $J = 8.0$  Hz, 1H), 6.21 (dd,  $J = 2.0, 15.6$  Hz, 1H), 4.90-4.86 (m, 1H), 4.22 (q,  $J = 7.2$  Hz, 2H), 2.93-2.75 (m, 2H), 2.22-2.15 (m, 1H), 1.93-1.86 (m, 1H), 1.31 (t,  $J = 7.2$  Hz, 3H);

$^{13}\text{C}$  NMR ( $\text{CDCl}_3$ , 100 MHz)  $\delta$  166.4, 149.5, 145.4, 128.3, 128.0, 123.4, 121.9 (2), 120.8, 74.7, 60.8, 26.7, 24.2, 14.4;

IR (film) 2981, 2935, 2849, 1721, 1662, 1573, 1460, 1368, 1306, 1242, 1180, 1102, 1040  $\text{cm}^{-1}$ ;

GCMS (EI) calcd for  $\text{C}_{14}\text{H}_{15}\text{ClO}_3$  266  $[\text{M}]^+$ , found 266.

The enantiomeric excess was determined by chiral HPLC analysis: Chiralcel OD-H column (1% *i*-PrOH:hexanes, 1.0 mL/min),  $t_r$  (minor) 9.5 min,  $t_r$  (major) 12.6 min.

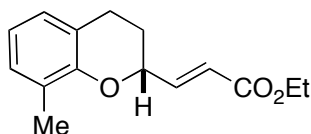

**(*R,E*)-Ethyl 3-(8-methylchroman-2-yl)prop-2-enoate (Table 3, entry 3).** The title compound was prepared according to the General Procedure with ethyl 6-(2-hydroxy-3-methylphenyl)hex-2-ynoate (123 mg, 0.50 mmol). After purification by flash

chromatography (5:20:75 Et<sub>2</sub>O/CH<sub>2</sub>Cl<sub>2</sub>/hexanes), the desired product was isolated as a colorless oil: run 1, 108 mg (88%; 84% ee); run 2, 111 mg (90%; 84% ee).

$R_f = 0.3$  (5:20:75 Et<sub>2</sub>O/CH<sub>2</sub>Cl<sub>2</sub>/hexanes);

$[\alpha]_D^{20} = +25$  (*c* 2.0, CHCl<sub>3</sub>);

<sup>1</sup>H NMR (CDCl<sub>3</sub>, 400 MHz)  $\delta$  7.05 (dd, *J* = 3.6, 15.6 Hz, 1H), 7.00 (d, *J* = 7.2 Hz, 1H), 6.91 (d, *J* = 7.2 Hz, 1H), 6.78 (t, *J* = 7.6 Hz, 1H), 6.18 (dd, *J* = 1.6, 15.6 Hz, 1H), 4.79-4.75 (m, 1H), 4.24 (q, *J* = 7.2 Hz, 2H), 2.93-2.74 (m, 2H), 2.25 (s, 3H), 2.19-2.13 (m, 1H), 1.90-1.80 (m, 1H), 1.33 (t, *J* = 7.2 Hz, 3H);

<sup>13</sup>C NMR (CDCl<sub>3</sub>, 100 MHz)  $\delta$  166.6, 152.1, 146.7, 128.8, 127.2, 126.2, 121.1, 121.0, 120.1, 74.0, 60.7, 27.2, 24.5, 16.2, 14.4;

IR (film) 2923, 1718, 1622, 1595, 1471, 1368, 1305, 1265, 1219, 1177, 1037 cm<sup>-1</sup>;

GCMS (EI) calcd for C<sub>15</sub>H<sub>18</sub>O<sub>3</sub> 246 [M]<sup>+</sup>, found 246.

The enantiomeric excess was determined by chiral HPLC analysis: Chiralcel OD-H column (1% *i*-PrOH:hexanes, 1.0 mL/min), *t<sub>r</sub>* (minor) 6.6 min, *t<sub>r</sub>* (major) 9.3 min.

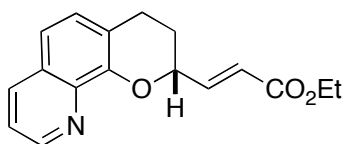

**(*R,E*)-Ethyl 3-(2,3-dihydro-1H-4-oxa-5-aza-phenanthren-3-yl)prop-2-enoate (Table 3, entry 4).** The title compound was prepared according to the General Procedure with ethyl 6-(8-hydroxyquinolin-7-yl)hex-2-ynoate (142 mg, 0.50 mmol). The reaction mixture was filtered through a thin pad of neutral alumina (3 cm x 0.5 cm) and then washed through with EtOAc. The filtrate was concentrated to give the crude product. After purification by flash chromatography (30:70 EtOAc/hexanes) using neutral alumina, the desired product was isolated as a dark-green solid: run 1, 115 mg (81%; 84% ee); run 2, 110 mg (77%; 84% ee).

$R_f = 0.3$  (30:70 EtOAc/hexanes);

mp 69-71 °C;

$[\alpha]_D^{20} = +140$  (*c* 1.0, CHCl<sub>3</sub>);

<sup>1</sup>H NMR (CDCl<sub>3</sub>, 400 MHz)  $\delta$  8.94 (dd, *J* = 2.0, 4.4 Hz, 1H), 8.09 (dd, *J* = 1.6, 8.4 Hz, 1H), 7.39 (dd, *J* = 4.0, 8.0 Hz, 1H), 7.33 (d, *J* = 8.4 Hz, 1H), 7.22 (d, *J* = 8.4 Hz, 1H), 7.12 (dd, *J* = 4.4, 15.6 Hz, 1H), 6.14 (dd, *J* = 1.6, 15.6 Hz, 1H), 5.21-5.16 (m, 1H), 4.22-4.14 (m, 2H), 3.00-2.87 (m, 2H), 2.32-2.25 (m, 1H), 2.15-2.07 (m, 1H), 1.27 (t, *J* = 7.2 Hz, 3H);

<sup>13</sup>C NMR (CDCl<sub>3</sub>, 100 MHz)  $\delta$  166.3, 149.6, 148.7, 145.8, 140.0, 135.9, 128.5, 128.3, 122.5, 121.2, 119.7, 119.2, 74.6, 60.6, 26.1, 23.5, 14.3;

IR (film) 2925, 1712, 1661, 1504, 1465, 1376, 1257, 1181, 1111 cm<sup>-1</sup>;

LCMS (ES + APCI) calcd for C<sub>17</sub>H<sub>18</sub>NO<sub>3</sub> 284.1 [M+H]<sup>+</sup>, found 284.1.

The enantiomeric excess was determined by chiral HPLC analysis: Chiralpak AD-H column (5% *i*-PrOH:hexanes, 1.0 mL/min), *t<sub>r</sub>* (major) 20.1 min, *t<sub>r</sub>* (minor) 30.2 min.



## II. Determination of Absolute Configuration

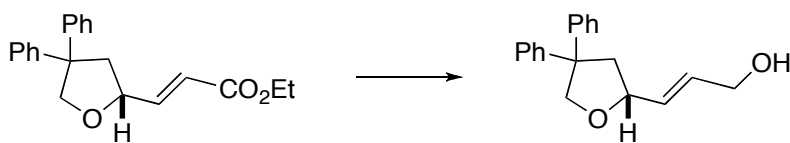

**(*R,E*)-3-(4,4-diphenyltetrahydrofuran-2-yl)prop-2-en-1-ol.** A solution of (*R,E*)-ethyl 3-(4,4-diphenyltetrahydrofuran-2-yl)prop-2-enoate (run 1 of Table 2, entry 3; 98 mg, 0.30 mmol; 87% ee) in THF (10 mL) at  $-78$  °C was treated with diisobutylaluminum hydride (1.0 M in hexanes; 0.90 mL, 0.90 mmol). The reaction mixture was warmed to 0 °C and stirred at this temperature for 30 min. The resulting mixture was washed with aqueous HCl (1 M; 20 mL), and the aqueous layer was extracted with Et<sub>2</sub>O (2 × 30 mL). The combined organic layers were dried over MgSO<sub>4</sub>, filtered, and concentrated to give the crude product. Purification by column chromatography furnished the desired product (53 mg; 63%) as a colorless oil. The product was crystallized (1:5 TBME/hexanes), and an X-ray crystal structure was obtained.

mp 73-75 °C;

$[\alpha]_D^{20} = +54$  (*c* 0.90, CHCl<sub>3</sub>);

<sup>1</sup>H NMR (CDCl<sub>3</sub>, 500 MHz)  $\delta$  7.34-7.19 (m, 10H), 5.86 (dt, *J* = 5.0, 15.5 Hz, 1H), 5.78 (ddt, *J* = 1.5, 7.0, 15.5 Hz, 1H), 4.67 (dd, *J* = 1.0, 9.0 Hz, 1H), 4.50-4.46 (m, 1H), 4.16 (d, *J* = 8.5 Hz, 1H), 4.14 (t, *J* = 6.0 Hz, 1H), 2.66 (ddd, *J* = 1.0, 6.0, 12.0 Hz, 1H), 2.46 (dd, *J* = 9.5, 12.0 Hz, 1H), 1.35 (t, *J* = 6.0 Hz, 1H);

<sup>13</sup>C NMR (CDCl<sub>3</sub>, 125 MHz)  $\delta$  146.0, 145.6, 132.0, 131.3, 128.6, 128.5, 127.29, 127.25, 126.7, 126.5, 78.9, 77.1, 63.1, 56.3, 45.3.

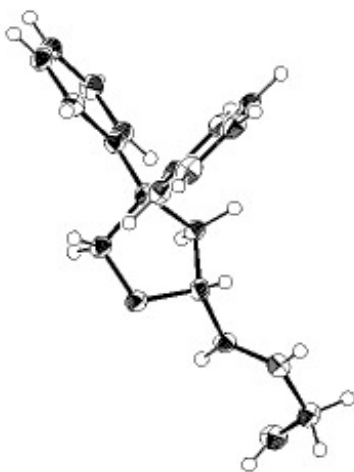

Table 1. Crystal data and structure refinement for d08013.

|                                   |                                                |                   |
|-----------------------------------|------------------------------------------------|-------------------|
| Identification code               | d08013                                         |                   |
| Empirical formula                 | C <sub>19</sub> H <sub>20</sub> O <sub>2</sub> |                   |
| Formula weight                    | 280.35                                         |                   |
| Temperature                       | 100(2) K                                       |                   |
| Wavelength                        | 1.54178 Å                                      |                   |
| Crystal system                    | Monoclinic                                     |                   |
| Space group                       | P2(1)                                          |                   |
| Unit cell dimensions              | a = 8.0415(2) Å                                | α = 90°.          |
|                                   | b = 10.5219(2) Å                               | β = 91.9240(10)°. |
|                                   | c = 17.8120(3) Å                               | γ = 90°.          |
| Volume                            | 1506.26(5) Å <sup>3</sup>                      |                   |
| Z                                 | 4                                              |                   |
| Density (calculated)              | 1.236 Mg/m <sup>3</sup>                        |                   |
| Absorption coefficient            | 0.619 mm <sup>-1</sup>                         |                   |
| F(000)                            | 600                                            |                   |
| Crystal size                      | 0.40 x 0.30 x 0.05 mm <sup>3</sup>             |                   |
| Theta range for data collection   | 2.48 to 67.73°.                                |                   |
| Index ranges                      | -9 ≤ h ≤ 9, -12 ≤ k ≤ 12, -21 ≤ l ≤ 21         |                   |
| Reflections collected             | 33734                                          |                   |
| Independent reflections           | 5436 [R(int) = 0.0256]                         |                   |
| Completeness to theta = 67.73°    | 99.9 %                                         |                   |
| Absorption correction             | Semi-empirical from equivalents                |                   |
| Max. and min. transmission        | 0.9697 and 0.7900                              |                   |
| Refinement method                 | Full-matrix least-squares on F <sup>2</sup>    |                   |
| Data / restraints / parameters    | 5436 / 3 / 385                                 |                   |
| Goodness-of-fit on F <sup>2</sup> | 1.110                                          |                   |
| Final R indices [I > 2σ(I)]       | R1 = 0.0376, wR2 = 0.1012                      |                   |
| R indices (all data)              | R1 = 0.0382, wR2 = 0.1016                      |                   |
| Absolute structure parameter      | 0.07(19)                                       |                   |
| Largest diff. peak and hole       | 0.195 and -0.220 e.Å <sup>-3</sup>             |                   |

Table 2. Atomic coordinates ( $\times 10^4$ ) and equivalent isotropic displacement parameters ( $\text{\AA}^2 \times 10^3$ ) for d08013.  $U(\text{eq})$  is defined as one third of the trace of the orthogonalized  $U_{ij}$  tensor.

|        | x        | y        | z       | $U(\text{eq})$ |
|--------|----------|----------|---------|----------------|
| O(1)   | 8060(2)  | 6245(1)  | 6985(1) | 32(1)          |
| O(2)   | 7557(2)  | 1497(1)  | 6697(1) | 31(1)          |
| C(1)   | 9070(2)  | 5430(2)  | 6521(1) | 28(1)          |
| C(2)   | 8761(2)  | 5932(2)  | 5725(1) | 27(1)          |
| C(3)   | 8476(2)  | 7360(2)  | 5850(1) | 24(1)          |
| C(4)   | 7361(3)  | 7256(2)  | 6531(1) | 28(1)          |
| C(5)   | 8591(3)  | 4067(2)  | 6628(1) | 31(1)          |
| C(6)   | 9674(3)  | 3131(2)  | 6668(1) | 26(1)          |
| C(7)   | 9286(3)  | 1741(2)  | 6715(1) | 30(1)          |
| C(11)  | 10152(2) | 8002(2)  | 6046(1) | 24(1)          |
| C(12)  | 11335(2) | 8083(2)  | 5489(1) | 27(1)          |
| C(13)  | 12887(3) | 8622(2)  | 5641(1) | 32(1)          |
| C(14)  | 13284(3) | 9109(2)  | 6346(1) | 35(1)          |
| C(15)  | 12124(3) | 9041(2)  | 6901(1) | 34(1)          |
| C(16)  | 10573(3) | 8484(2)  | 6754(1) | 30(1)          |
| C(21)  | 7566(2)  | 8053(2)  | 5202(1) | 24(1)          |
| C(22)  | 7356(2)  | 9366(2)  | 5247(1) | 27(1)          |
| C(23)  | 6512(2)  | 10028(2) | 4679(1) | 31(1)          |
| C(24)  | 5859(2)  | 9391(2)  | 4055(1) | 31(1)          |
| C(25)  | 6024(3)  | 8086(2)  | 4011(1) | 32(1)          |
| C(26)  | 6880(2)  | 7424(2)  | 4578(1) | 27(1)          |
| O(3)   | 7236(2)  | 444(1)   | 8111(1) | 26(1)          |
| O(4)   | 7011(2)  | -4359(1) | 8403(1) | 32(1)          |
| C(101) | 6052(2)  | -300(2)  | 8538(1) | 23(1)          |
| C(102) | 6312(2)  | 187(2)   | 9340(1) | 23(1)          |
| C(103) | 6633(2)  | 1617(2)  | 9218(1) | 23(1)          |
| C(104) | 7822(2)  | 1501(2)  | 8565(1) | 24(1)          |
| C(105) | 6356(2)  | -1695(2) | 8455(1) | 23(1)          |
| C(106) | 5158(2)  | -2501(2) | 8293(1) | 28(1)          |
| C(107) | 5362(3)  | -3927(2) | 8272(1) | 32(1)          |
| C(31)  | 7508(2)  | 2310(2)  | 9875(1) | 23(1)          |

|       |         |         |          |       |
|-------|---------|---------|----------|-------|
| C(32) | 8178(2) | 1696(2) | 10505(1) | 25(1) |
| C(33) | 9015(2) | 2366(2) | 11076(1) | 27(1) |
| C(34) | 9192(2) | 3675(2) | 11021(1) | 28(1) |
| C(35) | 8543(2) | 4304(2) | 10390(1) | 27(1) |
| C(36) | 7705(2) | 3629(2) | 9822(1)  | 26(1) |
| C(41) | 4967(2) | 2258(2) | 9001(1)  | 23(1) |
| C(42) | 3746(2) | 2325(2) | 9535(1)  | 26(1) |
| C(43) | 2189(3) | 2834(2) | 9360(1)  | 28(1) |
| C(44) | 1828(3) | 3297(2) | 8645(1)  | 32(1) |
| C(45) | 3035(3) | 3243(2) | 8110(1)  | 32(1) |
| C(46) | 4588(3) | 2722(2) | 8284(1)  | 27(1) |

---

Table 3. Bond lengths [Å] and angles [°] for d08013.

---

|               |          |
|---------------|----------|
| O(1)-C(4)     | 1.439(2) |
| O(1)-C(1)     | 1.457(2) |
| O(2)-C(7)     | 1.413(3) |
| C(1)-C(5)     | 1.499(3) |
| C(1)-C(2)     | 1.524(3) |
| C(2)-C(3)     | 1.538(3) |
| C(3)-C(21)    | 1.531(3) |
| C(3)-C(4)     | 1.536(3) |
| C(3)-C(11)    | 1.538(3) |
| C(5)-C(6)     | 1.315(3) |
| C(6)-C(7)     | 1.498(3) |
| C(11)-C(16)   | 1.390(3) |
| C(11)-C(12)   | 1.400(3) |
| C(12)-C(13)   | 1.389(3) |
| C(13)-C(14)   | 1.384(3) |
| C(14)-C(15)   | 1.383(3) |
| C(15)-C(16)   | 1.394(3) |
| C(21)-C(26)   | 1.392(3) |
| C(21)-C(22)   | 1.394(3) |
| C(22)-C(23)   | 1.387(3) |
| C(23)-C(24)   | 1.387(3) |
| C(24)-C(25)   | 1.381(3) |
| C(25)-C(26)   | 1.390(3) |
| O(3)-C(104)   | 1.445(2) |
| O(3)-C(101)   | 1.465(2) |
| O(4)-C(107)   | 1.414(3) |
| C(101)-C(105) | 1.496(3) |
| C(101)-C(102) | 1.525(3) |
| C(102)-C(103) | 1.543(3) |
| C(103)-C(31)  | 1.530(3) |
| C(103)-C(104) | 1.535(3) |
| C(103)-C(41)  | 1.538(3) |
| C(105)-C(106) | 1.308(3) |
| C(106)-C(107) | 1.510(3) |
| C(31)-C(32)   | 1.387(3) |

|             |          |
|-------------|----------|
| C(31)-C(36) | 1.401(3) |
| C(32)-C(33) | 1.392(3) |
| C(33)-C(34) | 1.388(3) |
| C(34)-C(35) | 1.390(3) |
| C(35)-C(36) | 1.392(3) |
| C(41)-C(46) | 1.391(3) |
| C(41)-C(42) | 1.391(3) |
| C(42)-C(43) | 1.387(3) |
| C(43)-C(44) | 1.386(3) |
| C(44)-C(45) | 1.384(3) |
| C(45)-C(46) | 1.389(3) |

|                   |            |
|-------------------|------------|
| C(4)-O(1)-C(1)    | 109.36(14) |
| O(1)-C(1)-C(5)    | 109.89(16) |
| O(1)-C(1)-C(2)    | 104.26(16) |
| C(5)-C(1)-C(2)    | 114.52(18) |
| C(1)-C(2)-C(3)    | 103.01(16) |
| C(21)-C(3)-C(4)   | 110.67(16) |
| C(21)-C(3)-C(11)  | 110.81(15) |
| C(4)-C(3)-C(11)   | 112.45(16) |
| C(21)-C(3)-C(2)   | 115.28(16) |
| C(4)-C(3)-C(2)    | 97.92(16)  |
| C(11)-C(3)-C(2)   | 109.17(16) |
| O(1)-C(4)-C(3)    | 105.59(15) |
| C(6)-C(5)-C(1)    | 123.45(19) |
| C(5)-C(6)-C(7)    | 126.6(2)   |
| O(2)-C(7)-C(6)    | 112.47(17) |
| C(16)-C(11)-C(12) | 118.02(19) |
| C(16)-C(11)-C(3)  | 123.47(18) |
| C(12)-C(11)-C(3)  | 118.50(17) |
| C(13)-C(12)-C(11) | 120.96(19) |
| C(14)-C(13)-C(12) | 120.41(19) |
| C(15)-C(14)-C(13) | 119.2(2)   |
| C(14)-C(15)-C(16) | 120.5(2)   |
| C(11)-C(16)-C(15) | 120.8(2)   |
| C(26)-C(21)-C(22) | 118.20(19) |
| C(26)-C(21)-C(3)  | 122.83(18) |

C(22)-C(21)-C(3) 118.93(18)  
C(23)-C(22)-C(21) 120.8(2)  
C(22)-C(23)-C(24) 120.3(2)  
C(25)-C(24)-C(23) 119.4(2)  
C(24)-C(25)-C(26) 120.2(2)  
C(25)-C(26)-C(21) 121.0(2)  
C(104)-O(3)-C(101) 109.02(14)  
O(3)-C(101)-C(105) 111.16(15)  
O(3)-C(101)-C(102) 103.61(15)  
C(105)-C(101)-C(102) 113.91(16)  
C(101)-C(102)-C(103) 102.40(15)  
C(31)-C(103)-C(104) 109.59(15)  
C(31)-C(103)-C(41) 110.97(15)  
C(104)-C(103)-C(41) 113.83(16)  
C(31)-C(103)-C(102) 115.59(16)  
C(104)-C(103)-C(102) 98.06(15)  
C(41)-C(103)-C(102) 108.34(15)  
O(3)-C(104)-C(103) 106.59(15)  
C(106)-C(105)-C(101) 122.42(18)  
C(105)-C(106)-C(107) 124.72(19)  
O(4)-C(107)-C(106) 114.70(17)  
C(32)-C(31)-C(36) 118.27(18)  
C(32)-C(31)-C(103) 123.57(18)  
C(36)-C(31)-C(103) 118.10(17)  
C(31)-C(32)-C(33) 121.34(19)  
C(34)-C(33)-C(32) 119.96(19)  
C(33)-C(34)-C(35) 119.48(19)  
C(34)-C(35)-C(36) 120.29(19)  
C(35)-C(36)-C(31) 120.65(19)  
C(46)-C(41)-C(42) 118.13(18)  
C(46)-C(41)-C(103) 123.17(18)  
C(42)-C(41)-C(103) 118.62(17)  
C(43)-C(42)-C(41) 121.24(19)  
C(44)-C(43)-C(42) 120.1(2)  
C(45)-C(44)-C(43) 119.19(19)  
C(44)-C(45)-C(46) 120.6(2)  
C(45)-C(46)-C(41) 120.7(2)

---

Symmetry transformations used to generate equivalent atoms:



Table 4. Anisotropic displacement parameters ( $\text{\AA}^2 \times 10^3$ ) for d08013. The anisotropic displacement factor exponent takes the form:  $-2\pi^2 [ h^2 a^{*2} U^{11} + \dots + 2 h k a^* b^* U^{12} ]$

|        | U11   | U22   | U33   | U23   | U13    | U12   |
|--------|-------|-------|-------|-------|--------|-------|
| O(1)   | 40(1) | 25(1) | 30(1) | 6(1)  | 10(1)  | 7(1)  |
| O(2)   | 36(1) | 26(1) | 32(1) | 6(1)  | -1(1)  | -4(1) |
| C(1)   | 26(1) | 29(1) | 31(1) | 2(1)  | 3(1)   | 4(1)  |
| C(2)   | 27(1) | 24(1) | 31(1) | 0(1)  | 2(1)   | 0(1)  |
| C(3)   | 25(1) | 22(1) | 26(1) | 1(1)  | 2(1)   | 1(1)  |
| C(4)   | 27(1) | 26(1) | 30(1) | 4(1)  | 6(1)   | 3(1)  |
| C(5)   | 24(1) | 35(1) | 33(1) | 4(1)  | 1(1)   | 1(1)  |
| C(6)   | 30(1) | 21(1) | 29(1) | -3(1) | 0(1)   | -2(1) |
| C(7)   | 36(1) | 25(1) | 28(1) | 1(1)  | 0(1)   | 1(1)  |
| C(11)  | 27(1) | 17(1) | 28(1) | 6(1)  | -1(1)  | 4(1)  |
| C(12)  | 28(1) | 23(1) | 30(1) | 4(1)  | 1(1)   | 1(1)  |
| C(13)  | 25(1) | 30(1) | 40(1) | 9(1)  | 4(1)   | 4(1)  |
| C(14)  | 24(1) | 29(1) | 51(1) | 7(1)  | -9(1)  | -1(1) |
| C(15)  | 36(1) | 31(1) | 35(1) | 0(1)  | -11(1) | 3(1)  |
| C(16)  | 29(1) | 30(1) | 29(1) | 4(1)  | 0(1)   | 3(1)  |
| C(21)  | 20(1) | 23(1) | 28(1) | 2(1)  | 5(1)   | -2(1) |
| C(22)  | 24(1) | 22(1) | 35(1) | 1(1)  | -2(1)  | -3(1) |
| C(23)  | 25(1) | 24(1) | 44(1) | 8(1)  | 0(1)   | -1(1) |
| C(24)  | 24(1) | 35(1) | 34(1) | 11(1) | 1(1)   | 0(1)  |
| C(25)  | 28(1) | 39(1) | 27(1) | 0(1)  | 1(1)   | -3(1) |
| C(26)  | 28(1) | 27(1) | 27(1) | 0(1)  | 3(1)   | 0(1)  |
| O(3)   | 31(1) | 21(1) | 26(1) | -1(1) | 5(1)   | -3(1) |
| O(4)   | 44(1) | 24(1) | 31(1) | 5(1)  | 7(1)   | 4(1)  |
| C(101) | 23(1) | 18(1) | 28(1) | 3(1)  | 2(1)   | 1(1)  |
| C(102) | 25(1) | 16(1) | 27(1) | 1(1)  | 2(1)   | 0(1)  |
| C(103) | 24(1) | 18(1) | 26(1) | 1(1)  | 1(1)   | 1(1)  |
| C(104) | 25(1) | 19(1) | 29(1) | 0(1)  | 2(1)   | 1(1)  |
| C(105) | 26(1) | 18(1) | 25(1) | 0(1)  | 3(1)   | 3(1)  |
| C(106) | 26(1) | 30(1) | 27(1) | 0(1)  | 3(1)   | 0(1)  |
| C(107) | 36(1) | 25(1) | 34(1) | -2(1) | 6(1)   | -6(1) |
| C(31)  | 19(1) | 22(1) | 27(1) | 0(1)  | 4(1)   | 2(1)  |
| C(32)  | 25(1) | 22(1) | 28(1) | 1(1)  | 3(1)   | 0(1)  |

|            |       |       |       |       |       |
|------------|-------|-------|-------|-------|-------|
| C(33)28(1) | 26(1) | 27(1) | 3(1)  | 0(1)  | -1(1) |
| C(34)22(1) | 32(1) | 28(1) | -6(1) | 0(1)  | -2(1) |
| C(35)24(1) | 20(1) | 38(1) | -2(1) | 2(1)  | 0(1)  |
| C(36)22(1) | 24(1) | 30(1) | 1(1)  | 0(1)  | 3(1)  |
| C(41)24(1) | 15(1) | 29(1) | -4(1) | 0(1)  | -3(1) |
| C(42)27(1) | 24(1) | 28(1) | -4(1) | -1(1) | -2(1) |
| C(43)25(1) | 20(1) | 39(1) | -9(1) | 2(1)  | -2(1) |
| C(44)22(1) | 22(1) | 50(1) | -6(1) | -8(1) | 1(1)  |
| C(45)34(1) | 27(1) | 36(1) | 5(1)  | -8(1) | -2(1) |
| C(46)29(1) | 23(1) | 29(1) | 0(1)  | 1(1)  | -2(1) |

---

Table 5. Hydrogen coordinates ( $\times 10^4$ ) and isotropic displacement parameters ( $\text{\AA}^2 \times 10^3$ ) for d08013.

|        | x        | y         | z        | U(eq) |
|--------|----------|-----------|----------|-------|
| H(2)   | 7320(30) | 1100(20)  | 7086(11) | 38    |
| H(1A)  | 10271    | 5544      | 6669     | 34    |
| H(2B)  | 7769     | 5527      | 5483     | 33    |
| H(2C)  | 9735     | 5782      | 5412     | 33    |
| H(4B)  | 7365     | 8064      | 6816     | 33    |
| H(4C)  | 6202     | 7054      | 6368     | 33    |
| H(5A)  | 7445     | 3869      | 6669     | 37    |
| H(6A)  | 10817    | 3359      | 6668     | 32    |
| H(7A)  | 9792     | 1296      | 6289     | 36    |
| H(7B)  | 9792     | 1393      | 7185     | 36    |
| H(12A) | 11073    | 7764      | 5000     | 33    |
| H(13A) | 13680    | 8658      | 5258     | 38    |
| H(14A) | 14342    | 9485      | 6448     | 42    |
| H(15A) | 12385    | 9376      | 7385     | 41    |
| H(16A) | 9795     | 8434      | 7142     | 36    |
| H(22A) | 7796     | 9813      | 5673     | 32    |
| H(23A) | 6382     | 10923     | 4718     | 37    |
| H(24A) | 5302     | 9848      | 3661     | 37    |
| H(25A) | 5552     | 7641      | 3592     | 38    |
| H(26A) | 6997     | 6528      | 4539     | 33    |
| H(4)   | 7570(30) | -4350(30) | 8022(11) | 39    |
| H(10A) | 4893     | -97       | 8355     | 27    |
| H(10B) | 7280     | -229      | 9595     | 27    |
| H(10C) | 5311     | 48        | 9638     | 27    |
| H(10D) | 7812     | 2293      | 8265     | 29    |
| H(10E) | 8972     | 1343      | 8758     | 29    |
| H(10F) | 7459     | -2007     | 8521     | 27    |
| H(10G) | 4082     | -2164     | 8181     | 33    |
| H(10H) | 4648     | -4307     | 8655     | 38    |
| H(10I) | 4958     | -4239     | 7775     | 38    |
| H(32A) | 8064     | 801       | 10547    | 30    |
| H(33A) | 9465     | 1928      | 11502    | 32    |

|        |      |      |       |    |
|--------|------|------|-------|----|
| H(34A) | 9753 | 4138 | 11411 | 33 |
| H(35A) | 8672 | 5198 | 10347 | 33 |
| H(36A) | 7262 | 4068 | 9394  | 31 |
| H(42A) | 3983 | 2016 | 10028 | 31 |
| H(43A) | 1370 | 2865 | 9732  | 34 |
| H(44A) | 764  | 3647 | 8523  | 38 |
| H(45A) | 2800 | 3565 | 7620  | 39 |
| H(46A) | 5400 | 2683 | 7909  | 33 |

---

Table 6. Hydrogen bonds for d08013 [ $\text{\AA}$  and  $^\circ$ ].

| D-H...A            | d(D-H)    | d(H...A)  | d(D...A) | $\angle(\text{DHA})$ |
|--------------------|-----------|-----------|----------|----------------------|
| O(2)-H(2)...O(3)   | 0.835(17) | 1.956(17) | 2.771(2) | 165(3)               |
| O(4)-H(4)...O(1)#1 | 0.827(16) | 2.002(19) | 2.765(2) | 153(3)               |

Symmetry transformations used to generate equivalent atoms:

#1  $x, y-1, z$

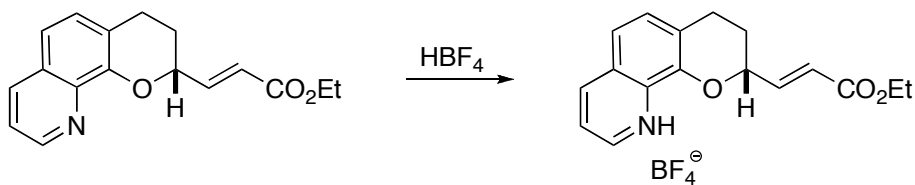

**(*R,E*)-Ethyl 3-(2,3-dihydro-1*H*-4-oxa-5-aza-phenanthren-3-yl)prop-2-enoate hydrotetrafluoroborate.** A solution of (*R,E*)-ethyl 3-(2,3-dihydro-1*H*-4-oxa-5-aza-phenanthren-3-yl)prop-2-enoate (run 2 of Table 3, entry 4; 110 mg, 0.388 mmol; 84% ee) in Et<sub>2</sub>O (10 mL) was treated with HBF<sub>4</sub> (54% in Et<sub>2</sub>O; 32 μL; 1.1 equiv), which produced a light-yellow precipitate. The mixture was filtered, and the solid was washed with Et<sub>2</sub>O and then dried to give an off-white solid (131 mg; 90%). The salt was recrystallized (7:1 TBME/EtOH) to give off-white crystals, and an X-ray crystal structure was obtained.

mp = 155-157 °C;

$[\alpha]_D^{20} = +43$  (*c* 1.5, CHCl<sub>3</sub>);

<sup>1</sup>H NMR (CDCl<sub>3</sub>, 500 MHz) δ 14.07 (br s, 1H), 9.15 (t, *J* = 6.0 Hz, 1H), 9.00 (d, *J* = 8.5 Hz, 1H), 8.03 (dd, *J* = 6.0, 7.5 Hz, 1H), 7.70 (d, *J* = 8.5 Hz, 1H), 7.59 (d, *J* = 8.5 Hz, 1H), 7.05 (dd, *J* = 3.5, 16.0 Hz, 1H), 6.28 (d, *J* = 15.5 Hz, 1H), 5.19 (d, *J* = 2.5 Hz, 1H), 4.14 (q, *J* = 7.0 Hz, 2H), 3.16-3.09 (m, 1H), 3.02-2.97 (m, 1H), 2.39-2.36 (m, 1H), 2.09-2.01 (m, 1H), 1.24 (t, *J* = 7.0 Hz, 3H);

<sup>13</sup>C NMR (CDCl<sub>3</sub>, 125 MHz) δ 166.7, 147.5, 144.1, 143.8, 143.2, 132.3, 128.8, 128.5, 127.1, 122.5, 122.1, 120.0, 75.8, 61.1, 25.9, 23.9, 14.2.

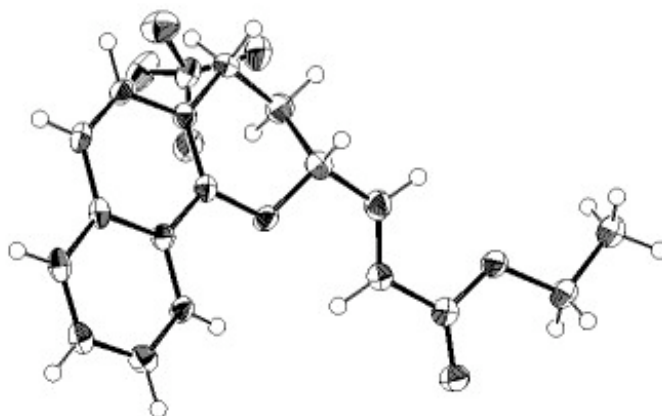

Table 1. Crystal data and structure refinement for d08029.

|                                   |                                             |                               |
|-----------------------------------|---------------------------------------------|-------------------------------|
| Identification code               | d08029                                      |                               |
| Empirical formula                 | C17 H18 B F4 N O3                           |                               |
| Formula weight                    | 371.13                                      |                               |
| Temperature                       | 100(2) K                                    |                               |
| Wavelength                        | 1.54178 Å                                   |                               |
| Crystal system                    | Monoclinic                                  |                               |
| Space group                       | P2(1)                                       |                               |
| Unit cell dimensions              | a = 8.8043(2) Å                             | $\alpha = 90^\circ$ .         |
|                                   | b = 19.9898(4) Å                            | $\beta = 93.9780(10)^\circ$ . |
|                                   | c = 9.5230(2) Å                             | $\gamma = 90^\circ$ .         |
| Volume                            | 1671.97(6) Å <sup>3</sup>                   |                               |
| Z                                 | 4                                           |                               |
| Density (calculated)              | 1.474 Mg/m <sup>3</sup>                     |                               |
| Absorption coefficient            | 1.115 mm <sup>-1</sup>                      |                               |
| F(000)                            | 768                                         |                               |
| Crystal size                      | 0.48 x 0.11 x 0.06 mm <sup>3</sup>          |                               |
| Theta range for data collection   | 4.42 to 67.90°.                             |                               |
| Index ranges                      | -10 ≤ h ≤ 10, -22 ≤ k ≤ 24, -11 ≤ l ≤ 11    |                               |
| Reflections collected             | 27767                                       |                               |
| Independent reflections           | 5624 [R(int) = 0.0229]                      |                               |
| Completeness to theta = 67.90°    | 100.0 %                                     |                               |
| Absorption correction             | Semi-empirical from equivalents             |                               |
| Max. and min. transmission        | 0.9361 and 0.6168                           |                               |
| Refinement method                 | Full-matrix least-squares on F <sup>2</sup> |                               |
| Data / restraints / parameters    | 5624 / 71 / 477                             |                               |
| Goodness-of-fit on F <sup>2</sup> | 1.030                                       |                               |
| Final R indices [I > 2σ(I)]       | R1 = 0.0336, wR2 = 0.0897                   |                               |
| R indices (all data)              | R1 = 0.0344, wR2 = 0.0903                   |                               |
| Absolute structure parameter      | 0.15(9)                                     |                               |
| Largest diff. peak and hole       | 0.509 and -0.287 e.Å <sup>-3</sup>          |                               |

Table 2. Atomic coordinates ( $\times 10^4$ ) and equivalent isotropic displacement parameters ( $\text{\AA}^2 \times 10^3$ ) for d08029.  $U(\text{eq})$  is defined as one third of the trace of the orthogonalized  $U_{ij}$  tensor.

|        | x        | y       | z        | $U(\text{eq})$ |
|--------|----------|---------|----------|----------------|
| O(1)   | 9822(2)  | 1756(1) | 1764(1)  | 23(1)          |
| O(2)   | 5188(2)  | 311(1)  | 1968(2)  | 26(1)          |
| O(3)   | 4767(2)  | 1186(1) | 3363(1)  | 24(1)          |
| N(1)   | 11616(2) | 1143(1) | 7(2)     | 24(1)          |
| C(1)   | 8738(2)  | 2190(1) | 2376(2)  | 23(1)          |
| C(2)   | 9460(2)  | 2497(1) | 3721(2)  | 26(1)          |
| C(3)   | 10803(2) | 2936(1) | 3381(2)  | 23(1)          |
| C(4)   | 11755(2) | 2603(1) | 2330(2)  | 19(1)          |
| C(5)   | 11208(2) | 2042(1) | 1617(2)  | 20(1)          |
| C(6)   | 12131(2) | 1712(1) | 677(2)   | 20(1)          |
| C(7)   | 13214(2) | 2853(1) | 2050(2)  | 22(1)          |
| C(8)   | 14102(2) | 2554(1) | 1115(2)  | 22(1)          |
| C(9)   | 13592(2) | 1959(1) | 410(2)   | 21(1)          |
| C(10)  | 14454(2) | 1593(1) | -518(2)  | 24(1)          |
| C(11)  | 13883(2) | 1013(1) | -1137(2) | 26(1)          |
| C(12)  | 12427(3) | 800(1)  | -867(2)  | 27(1)          |
| C(13)  | 7340(2)  | 1801(1) | 2617(2)  | 23(1)          |
| C(14)  | 7021(2)  | 1185(1) | 2193(2)  | 22(1)          |
| C(15)  | 5588(2)  | 844(1)  | 2483(2)  | 21(1)          |
| C(16)  | 3365(2)  | 882(1)  | 3784(2)  | 27(1)          |
| C(17)  | 3691(3)  | 437(1)  | 5027(2)  | 37(1)          |
| O(101) | 5151(2)  | 3688(1) | 7444(2)  | 25(1)          |
| O(102) | 9800(2)  | 5102(1) | 7972(2)  | 29(1)          |
| O(103) | 10156(2) | 4480(1) | 6062(2)  | 28(1)          |
| N(101) | 3296(2)  | 4186(1) | 9277(2)  | 24(1)          |
| C(101) | 5952(3)  | 3501(1) | 6213(2)  | 28(1)          |
| C(102) | 6097(3)  | 2748(1) | 6172(2)  | 31(1)          |
| C(103) | 4535(2)  | 2426(1) | 5967(2)  | 24(1)          |
| C(104) | 3430(2)  | 2758(1) | 6890(2)  | 22(1)          |
| C(105) | 3842(2)  | 3344(1) | 7583(2)  | 21(1)          |
| C(106) | 2864(2)  | 3624(1) | 8538(2)  | 21(1)          |



|        |          |         |          |       |
|--------|----------|---------|----------|-------|
| C(107) | 1984(2)  | 2472(1) | 7103(2)  | 23(1) |
| C(108) | 1006(2)  | 2745(1) | 7988(2)  | 24(1) |
| C(109) | 1435(2)  | 3330(1) | 8763(2)  | 22(1) |
| C(110) | 539(2)   | 3635(1) | 9753(2)  | 26(1) |
| C(111) | 1050(2)  | 4195(1) | 10480(2) | 26(1) |
| C(112) | 2456(2)  | 4467(1) | 10223(2) | 27(1) |
| C(113) | 7427(3)  | 3864(1) | 6266(2)  | 29(1) |
| C(114) | 8002(2)  | 4253(1) | 7306(2)  | 23(1) |
| C(115) | 9395(2)  | 4651(1) | 7175(2)  | 23(1) |
| C(116) | 11440(3) | 4902(1) | 5759(2)  | 31(1) |
| C(117) | 12094(3) | 4642(2) | 4462(3)  | 43(1) |
| B(1)   | 6809(3)  | 4009(1) | 1954(3)  | 26(1) |
| F(1)   | 5629(2)  | 4442(1) | 1748(3)  | 84(1) |
| F(2)   | 6488(2)  | 3531(1) | 2954(2)  | 50(1) |
| F(3)   | 7037(2)  | 3657(1) | 727(2)   | 58(1) |
| F(4)   | 8136(1)  | 4352(1) | 2405(1)  | 34(1) |
| B(2)   | 8267(3)  | 1234(1) | 7874(3)  | 27(1) |
| F(5)   | 9270(2)  | 1363(1) | 6858(2)  | 42(1) |
| F(6)   | 6854(2)  | 1047(1) | 7275(2)  | 40(1) |
| F(7)   | 8838(2)  | 723(1)  | 8757(2)  | 44(1) |
| F(8)   | 8102(2)  | 1807(1) | 8701(1)  | 35(1) |

---

Table 3. Bond lengths [Å] and angles [°] for d08029.

---

|               |          |
|---------------|----------|
| O(1)-C(5)     | 1.364(2) |
| O(1)-C(1)     | 1.443(2) |
| O(2)-C(15)    | 1.215(3) |
| O(3)-C(15)    | 1.333(2) |
| O(3)-C(16)    | 1.457(2) |
| N(1)-C(12)    | 1.325(3) |
| N(1)-C(6)     | 1.367(3) |
| C(1)-C(13)    | 1.487(3) |
| C(1)-C(2)     | 1.520(3) |
| C(2)-C(3)     | 1.525(3) |
| C(3)-C(4)     | 1.504(3) |
| C(4)-C(5)     | 1.381(3) |
| C(4)-C(7)     | 1.420(3) |
| C(5)-C(6)     | 1.413(3) |
| C(6)-C(9)     | 1.417(3) |
| C(7)-C(8)     | 1.363(3) |
| C(8)-C(9)     | 1.424(3) |
| C(9)-C(10)    | 1.408(3) |
| C(10)-C(11)   | 1.380(3) |
| C(11)-C(12)   | 1.392(3) |
| C(13)-C(14)   | 1.321(3) |
| C(14)-C(15)   | 1.477(3) |
| C(16)-C(17)   | 1.492(3) |
| O(101)-C(105) | 1.355(2) |
| O(101)-C(101) | 1.458(3) |
| O(102)-C(115) | 1.216(3) |
| O(103)-C(115) | 1.337(3) |
| O(103)-C(116) | 1.455(3) |
| N(101)-C(112) | 1.328(3) |
| N(101)-C(106) | 1.366(3) |
| C(101)-C(113) | 1.485(3) |
| C(101)-C(102) | 1.513(3) |
| C(102)-C(103) | 1.518(3) |
| C(103)-C(104) | 1.510(3) |
| C(104)-C(105) | 1.380(3) |

|                  |            |
|------------------|------------|
| C(104)-C(107)    | 1.423(3)   |
| C(105)-C(106)    | 1.411(3)   |
| C(106)-C(109)    | 1.419(3)   |
| C(107)-C(108)    | 1.360(3)   |
| C(108)-C(109)    | 1.420(3)   |
| C(109)-C(110)    | 1.409(3)   |
| C(110)-C(111)    | 1.376(3)   |
| C(111)-C(112)    | 1.389(3)   |
| C(113)-C(114)    | 1.331(3)   |
| C(114)-C(115)    | 1.474(3)   |
| C(116)-C(117)    | 1.493(3)   |
| B(1)-F(1)        | 1.356(3)   |
| B(1)-F(3)        | 1.390(3)   |
| B(1)-F(2)        | 1.391(3)   |
| B(1)-F(4)        | 1.396(3)   |
| B(2)-F(5)        | 1.379(3)   |
| B(2)-F(6)        | 1.384(3)   |
| B(2)-F(7)        | 1.394(3)   |
| B(2)-F(8)        | 1.402(3)   |
|                  |            |
| C(5)-O(1)-C(1)   | 114.25(15) |
| C(15)-O(3)-C(16) | 117.73(16) |
| C(12)-N(1)-C(6)  | 123.29(18) |
| O(1)-C(1)-C(13)  | 108.99(16) |
| O(1)-C(1)-C(2)   | 109.51(16) |
| C(13)-C(1)-C(2)  | 112.54(17) |
| C(1)-C(2)-C(3)   | 109.79(16) |
| C(4)-C(3)-C(2)   | 111.30(17) |
| C(5)-C(4)-C(7)   | 118.82(18) |
| C(5)-C(4)-C(3)   | 119.68(17) |
| C(7)-C(4)-C(3)   | 121.50(17) |
| O(1)-C(5)-C(4)   | 125.04(18) |
| O(1)-C(5)-C(6)   | 115.35(17) |
| C(4)-C(5)-C(6)   | 119.59(18) |
| N(1)-C(6)-C(5)   | 119.80(18) |
| N(1)-C(6)-C(9)   | 118.80(18) |
| C(5)-C(6)-C(9)   | 121.41(18) |

C(8)-C(7)-C(4) 122.46(19)  
C(7)-C(8)-C(9) 119.81(18)  
C(10)-C(9)-C(6) 117.87(18)  
C(10)-C(9)-C(8) 124.30(18)  
C(6)-C(9)-C(8) 117.82(18)  
C(11)-C(10)-C(9) 120.52(19)  
C(10)-C(11)-C(12) 119.43(19)  
N(1)-C(12)-C(11) 120.1(2)  
C(14)-C(13)-C(1) 126.97(19)  
C(13)-C(14)-C(15) 122.66(19)  
O(2)-C(15)-O(3) 123.33(18)  
O(2)-C(15)-C(14) 123.81(18)  
O(3)-C(15)-C(14) 112.85(17)  
O(3)-C(16)-C(17) 110.33(17)  
C(105)-O(101)-C(101)114.28(16)  
C(115)-O(103)-C(116)116.59(17)  
C(112)-N(101)-C(106)123.24(19)  
O(101)-C(101)-C(113)108.57(17)  
O(101)-C(101)-C(102)108.75(18)  
C(113)-C(101)-C(102)114.34(19)  
C(101)-C(102)-C(103)110.38(19)  
C(104)-C(103)-C(102)110.67(17)  
C(105)-C(104)-C(107)118.76(19)  
C(105)-C(104)-C(103)119.54(18)  
C(107)-C(104)-C(103)121.67(19)  
O(101)-C(105)-C(104)125.46(18)  
O(101)-C(105)-C(106)115.02(17)  
C(104)-C(105)-C(106)119.51(18)  
N(101)-C(106)-C(105)119.86(18)  
N(101)-C(106)-C(109)118.77(18)  
C(105)-C(106)-C(109)121.37(19)  
C(108)-C(107)-C(104)122.54(19)  
C(107)-C(108)-C(109)119.74(19)  
C(110)-C(109)-C(106)117.72(19)  
C(110)-C(109)-C(108)124.31(19)  
C(106)-C(109)-C(108)117.98(18)  
C(111)-C(110)-C(109)120.70(19)

C(110)-C(111)-C(112)119.6(2)  
N(101)-C(112)-C(111)120.0(2)  
C(114)-C(113)-C(101)126.69(19)  
C(113)-C(114)-C(115)121.88(19)  
O(102)-C(115)-O(103)122.90(19)  
O(102)-C(115)-C(114)123.81(19)  
O(103)-C(115)-C(114)113.26(18)  
O(103)-C(116)-C(117)108.14(19)  
F(1)-B(1)-F(3) 110.8(2)  
F(1)-B(1)-F(2) 110.3(2)  
F(3)-B(1)-F(2) 106.1(2)  
F(1)-B(1)-F(4) 110.3(2)  
F(3)-B(1)-F(4) 109.90(19)  
F(2)-B(1)-F(4) 109.40(18)  
F(5)-B(2)-F(6) 111.19(19)  
F(5)-B(2)-F(7) 109.78(19)  
F(6)-B(2)-F(7) 109.07(19)  
F(5)-B(2)-F(8) 109.75(19)  
F(6)-B(2)-F(8) 109.12(18)  
F(7)-B(2)-F(8) 107.86(18)

---

Symmetry transformations used to generate equivalent atoms:

Table 4. Anisotropic displacement parameters ( $\text{\AA}^2 \times 10^3$ ) for d08029. The anisotropic displacement factor exponent takes the form:  $-2\pi^2 [ h^2 a^{*2} U^{11} + \dots + 2 h k a^* b^* U^{12} ]$

|        | U11   | U22   | U33   | U23   | U13   | U12    |
|--------|-------|-------|-------|-------|-------|--------|
| O(1)   | 19(1) | 22(1) | 27(1) | -3(1) | 7(1)  | -4(1)  |
| O(2)   | 25(1) | 22(1) | 32(1) | -2(1) | 5(1)  | 0(1)   |
| O(3)   | 22(1) | 25(1) | 27(1) | -4(1) | 6(1)  | -4(1)  |
| N(1)   | 22(1) | 25(1) | 26(1) | -1(1) | 5(1)  | -4(1)  |
| C(1)   | 21(1) | 21(1) | 27(1) | 2(1)  | 4(1)  | 2(1)   |
| C(2)   | 24(1) | 29(1) | 25(1) | -4(1) | 7(1)  | -3(1)  |
| C(3)   | 24(1) | 22(1) | 24(1) | 0(1)  | 2(1)  | -3(1)  |
| C(4)   | 20(1) | 18(1) | 19(1) | 3(1)  | 0(1)  | 1(1)   |
| C(5)   | 18(1) | 22(1) | 20(1) | 4(1)  | 2(1)  | -1(1)  |
| C(6)   | 21(1) | 20(1) | 19(1) | 3(1)  | 2(1)  | -1(1)  |
| C(7)   | 22(1) | 20(1) | 23(1) | 3(1)  | 0(1)  | -3(1)  |
| C(8)   | 17(1) | 23(1) | 26(1) | 6(1)  | 2(1)  | 1(1)   |
| C(9)   | 19(1) | 22(1) | 21(1) | 6(1)  | 1(1)  | 3(1)   |
| C(10)  | 21(1) | 30(1) | 20(1) | 7(1)  | 3(1)  | 4(1)   |
| C(11)  | 27(1) | 31(1) | 22(1) | 1(1)  | 4(1)  | 6(1)   |
| C(12)  | 31(1) | 26(1) | 24(1) | -4(1) | 5(1)  | 1(1)   |
| C(13)  | 20(1) | 27(1) | 23(1) | 0(1)  | 4(1)  | 3(1)   |
| C(14)  | 22(1) | 24(1) | 20(1) | 3(1)  | 3(1)  | 2(1)   |
| C(15)  | 22(1) | 19(1) | 22(1) | 4(1)  | 0(1)  | 2(1)   |
| C(16)  | 21(1) | 30(1) | 30(1) | -2(1) | 6(1)  | -2(1)  |
| C(17)  | 43(1) | 41(1) | 27(1) | -2(1) | 3(1)  | -16(1) |
| O(101) | 22(1) | 23(1) | 30(1) | -6(1) | 8(1)  | -6(1)  |
| O(102) | 28(1) | 28(1) | 30(1) | -4(1) | 1(1)  | -2(1)  |
| O(103) | 23(1) | 30(1) | 31(1) | -5(1) | 6(1)  | -6(1)  |
| N(101) | 20(1) | 22(1) | 30(1) | -2(1) | 8(1)  | -4(1)  |
| C(101) | 29(1) | 29(1) | 27(1) | -2(1) | 6(1)  | -1(1)  |
| C(102) | 28(1) | 32(1) | 36(1) | -6(1) | 12(1) | -2(1)  |
| C(103) | 28(1) | 24(1) | 22(1) | -4(1) | 4(1)  | -2(1)  |
| C(104) | 25(1) | 21(1) | 19(1) | 2(1)  | 1(1)  | 1(1)   |
| C(105) | 19(1) | 23(1) | 22(1) | 3(1)  | 2(1)  | -1(1)  |
| C(106) | 20(1) | 21(1) | 21(1) | 2(1)  | 2(1)  | 1(1)   |
| C(107) | 26(1) | 20(1) | 22(1) | 3(1)  | -1(1) | -5(1)  |

|             |       |        |        |        |        |
|-------------|-------|--------|--------|--------|--------|
| C(108)21(1) | 25(1) | 26(1)  | 8(1)   | 0(1)   | -4(1)  |
| C(109)18(1) | 26(1) | 22(1)  | 9(1)   | 3(1)   | 2(1)   |
| C(110)21(1) | 30(1) | 26(1)  | 11(1)  | 6(1)   | 6(1)   |
| C(111)27(1) | 27(1) | 26(1)  | 6(1)   | 8(1)   | 8(1)   |
| C(112)30(1) | 23(1) | 28(1)  | -1(1)  | 4(1)   | 7(1)   |
| C(113)28(1) | 28(1) | 32(1)  | 0(1)   | 9(1)   | 0(1)   |
| C(114)22(1) | 23(1) | 24(1)  | 2(1)   | 3(1)   | 3(1)   |
| C(115)21(1) | 24(1) | 24(1)  | 4(1)   | -2(1)  | 4(1)   |
| C(116)26(1) | 33(1) | 34(1)  | -3(1)  | 3(1)   | -10(1) |
| C(117)43(1) | 46(2) | 42(1)  | -6(1)  | 12(1)  | -21(1) |
| B(1) 22(1)  | 26(1) | 29(1)  | -1(1)  | 3(1)   | -2(1)  |
| F(1) 41(1)  | 42(1) | 165(2) | -17(1) | -38(1) | 11(1)  |
| F(2) 53(1)  | 64(1) | 33(1)  | 8(1)   | 1(1)   | -25(1) |
| F(3) 58(1)  | 81(1) | 37(1)  | -18(1) | 20(1)  | -29(1) |
| F(4) 25(1)  | 35(1) | 41(1)  | 4(1)   | -1(1)  | -7(1)  |
| B(2) 21(1)  | 25(1) | 34(1)  | 4(1)   | 3(1)   | -3(1)  |
| F(5) 41(1)  | 42(1) | 46(1)  | -3(1)  | 19(1)  | -14(1) |
| F(6) 22(1)  | 48(1) | 50(1)  | -12(1) | -1(1)  | -4(1)  |
| F(7) 38(1)  | 29(1) | 62(1)  | 16(1)  | -10(1) | -7(1)  |
| F(8) 32(1)  | 31(1) | 41(1)  | -1(1)  | 6(1)   | -5(1)  |

---

Table 5. Hydrogen coordinates ( $\times 10^4$ ) and isotropic displacement parameters ( $\text{\AA}^2 \times 10^3$ ) for d08029.

|        | x         | y        | z        | U(eq) |
|--------|-----------|----------|----------|-------|
| H(1N)  | 10690(20) | 987(13)  | 140(30)  | 29    |
| H(1)   | 8462      | 2558     | 1694     | 27    |
| H(2A)  | 9814      | 2138     | 4382     | 31    |
| H(2B)  | 8697      | 2770     | 4180     | 31    |
| H(3A)  | 10420     | 3369     | 2997     | 28    |
| H(3B)  | 11443     | 3028     | 4257     | 28    |
| H(7)   | 13584     | 3242     | 2533     | 27    |
| H(8)   | 15059     | 2743     | 933      | 27    |
| H(10)  | 15436     | 1747     | -720     | 28    |
| H(11)  | 14479     | 761      | -1742    | 32    |
| H(12)  | 12014     | 408      | -1309    | 32    |
| H(13)  | 6597      | 2019     | 3132     | 28    |
| H(14)  | 7742      | 951      | 1681     | 27    |
| H(16A) | 2888      | 618      | 2992     | 32    |
| H(16B) | 2642      | 1236     | 4024     | 32    |
| H(17A) | 4333      | 63       | 4763     | 55    |
| H(17B) | 2732      | 263      | 5345     | 55    |
| H(17C) | 4223      | 692      | 5790     | 55    |
| H(01N) | 4140(20)  | 4359(13) | 9210(30) | 28    |
| H(101) | 5326      | 3649     | 5352     | 34    |
| H(10A) | 6619      | 2587     | 7063     | 38    |
| H(10B) | 6720      | 2617     | 5390     | 38    |
| H(10C) | 4153      | 2465     | 4968     | 29    |
| H(10D) | 4615      | 1944     | 6204     | 29    |
| H(107) | 1690      | 2075     | 6607     | 28    |
| H(108) | 41        | 2545     | 8088     | 29    |
| H(110) | -428      | 3452     | 9919     | 31    |
| H(111) | 445       | 4395     | 11153    | 31    |
| H(112) | 2817      | 4853     | 10723    | 32    |
| H(113) | 8020      | 3814     | 5477     | 35    |
| H(114) | 7500      | 4276     | 8156     | 28    |
| H(11A) | 12220     | 4892     | 6560     | 37    |



|        |       |      |      |    |
|--------|-------|------|------|----|
| H(11B) | 11098 | 5370 | 5612 | 37 |
| H(11C) | 12477 | 4187 | 4634 | 65 |
| H(11D) | 12932 | 4932 | 4214 | 65 |
| H(11E) | 11303 | 4636 | 3686 | 65 |

---

Table 6. Hydrogen bonds for d08029 [ $\text{\AA}$  and  $^\circ$ ].

| D-H...A                         | d(D-H)  | d(H...A) | d(D...A) | $\angle(\text{DHA})$ |
|---------------------------------|---------|----------|----------|----------------------|
| N(1)-H(1N)...F(7)#10.888(16)    | 2.09(2) | 2.775(2) | 133(2)   |                      |
| N(1)-H(1N)...O(102)#20.888(16)  | 2.58(2) | 3.150(2) | 123(2)   |                      |
| N(101)-H(01N)...O(2)#30.826(17) | 2.31(2) | 2.909(2) | 130(2)   |                      |

Symmetry transformations used to generate equivalent atoms:

#1  $x, y, z-1$  #2  $-x+2, y-1/2, -z+1$  #3  $-x+1, y+1/2, -z+1$

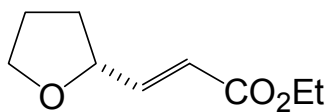

Table 2, entry 1

7.27  
6.93  
6.92  
6.90  
6.88  
6.03  
6.03  
5.99  
5.99  
4.54  
4.53  
4.52  
4.52  
4.50  
4.50  
4.49  
4.49  
4.21  
4.20  
4.18  
4.16  
3.96  
3.94  
3.92  
3.91  
3.86  
3.85  
3.82  
3.81  
2.17  
2.13  
2.10  
2.09  
1.96  
1.92  
1.89  
1.74  
1.70  
1.69  
1.65  
1.30  
1.28  
1.26

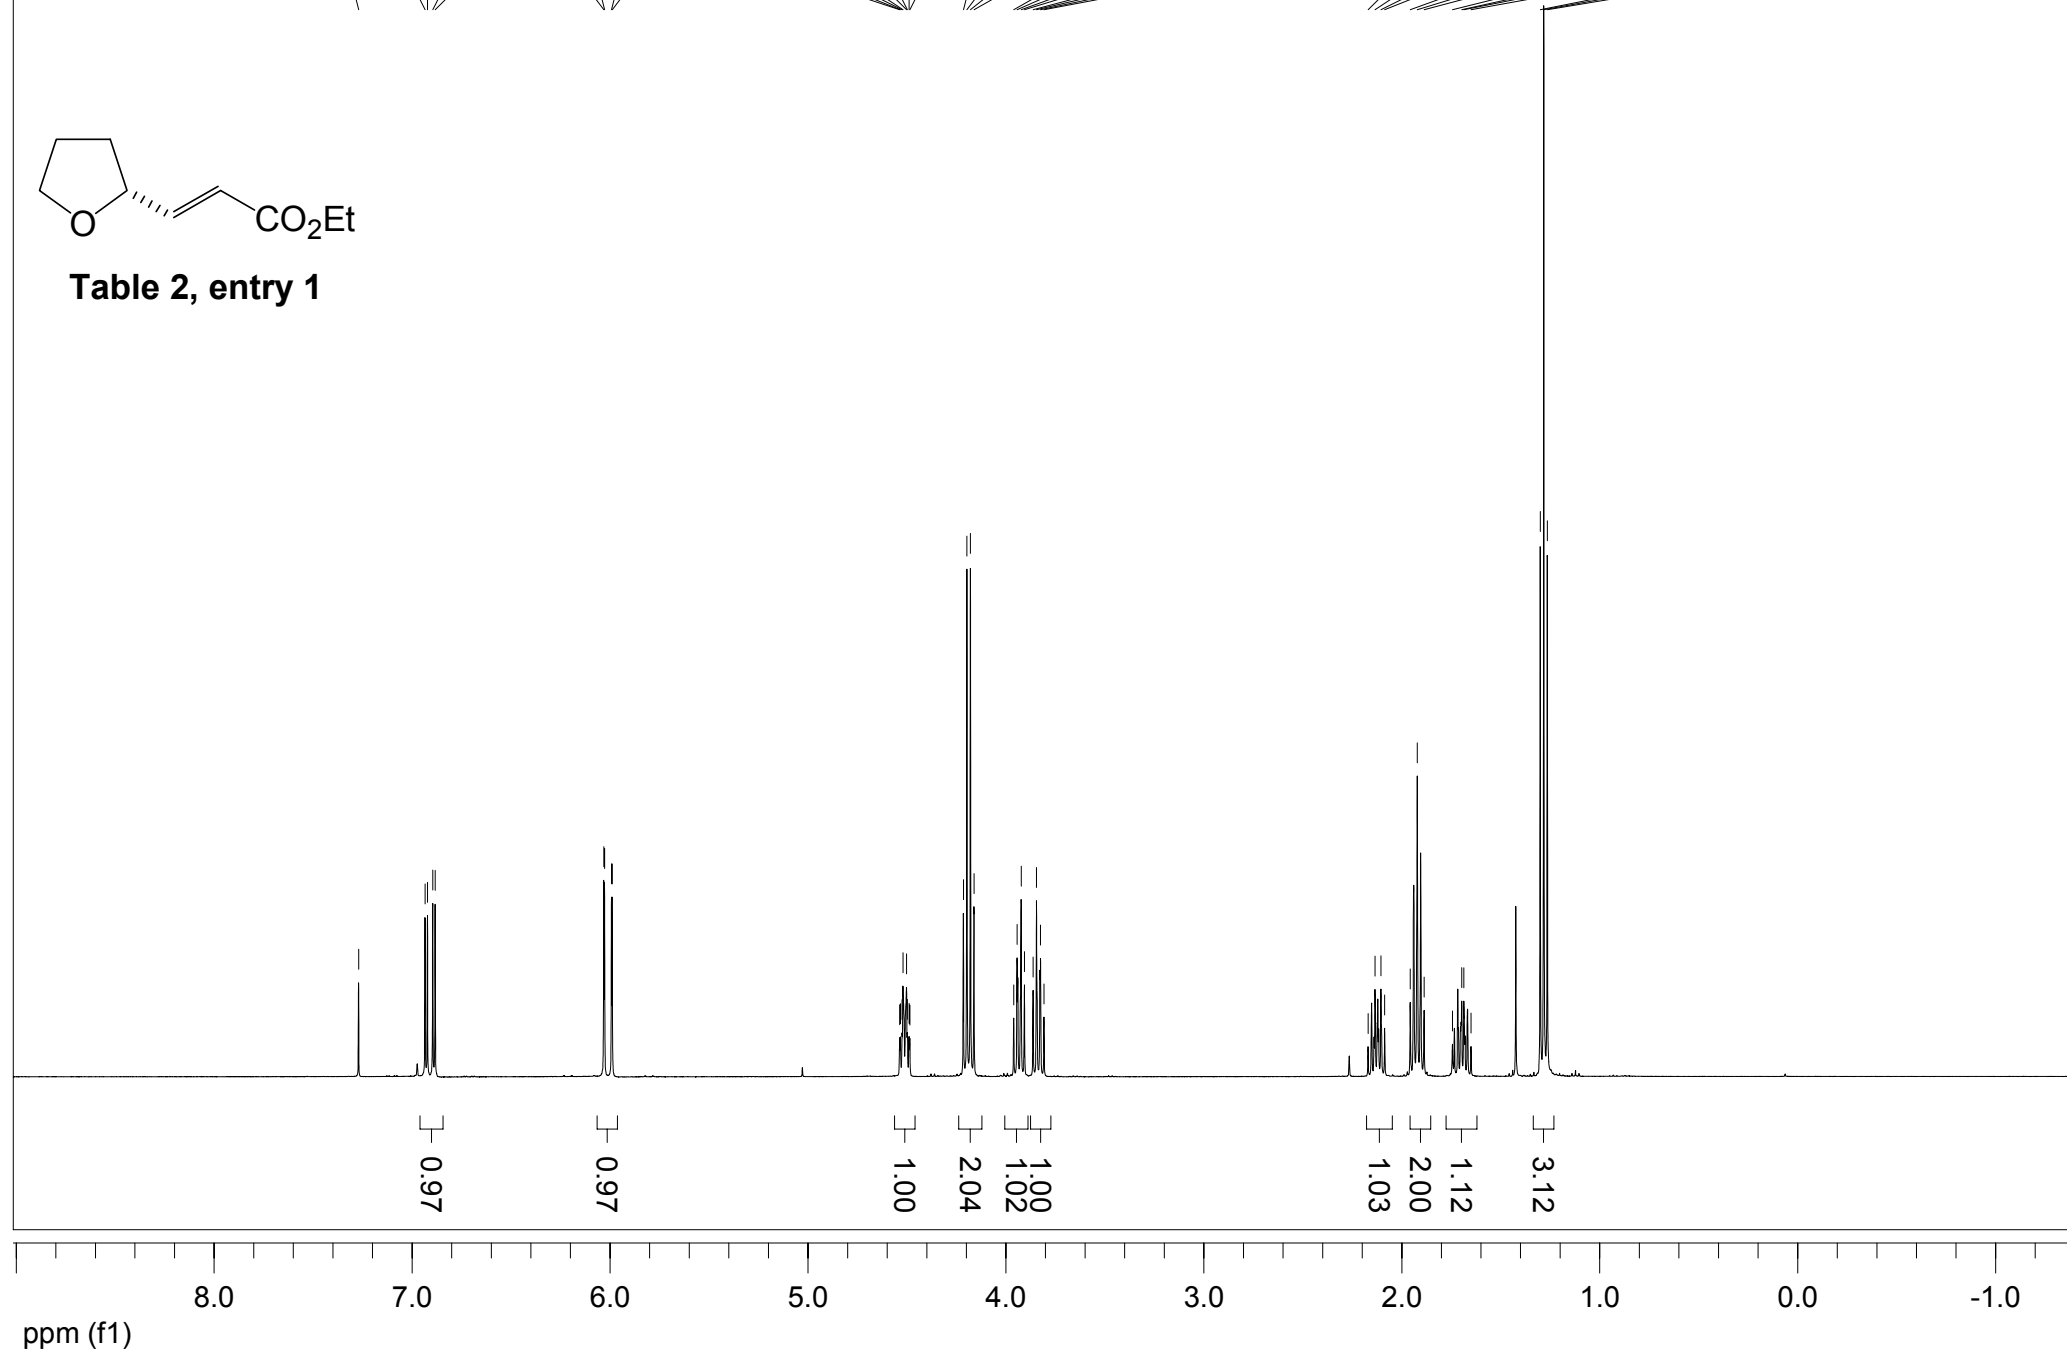

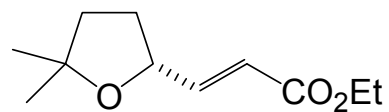

Table 2, entry 2

7.27  
6.96  
6.95  
6.92  
6.91  
6.05  
6.05  
6.01  
6.01  
4.61  
4.60  
4.60  
4.59  
4.59  
4.58  
4.58  
4.57  
4.56  
4.56  
4.22  
4.20  
4.18  
4.16  
2.25  
2.22  
2.20  
2.17  
2.16  
1.83  
1.81  
1.79  
1.78  
1.75  
1.30  
1.29  
1.28  
1.27

56.0

16.0

86.1

66.0

00.3

07.20

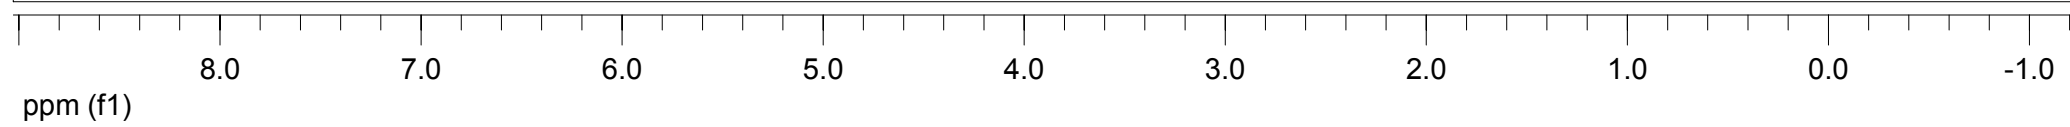

7.35  
7.33  
7.32  
7.30  
7.27  
7.24  
7.20  
7.18  
7.02  
7.00  
6.98  
6.96  
6.10  
6.09  
6.06  
6.06  
4.77  
4.74  
4.65  
4.63  
4.62  
4.61  
4.59  
4.23  
4.22  
4.20  
4.18  
4.17  
4.15  
2.76  
2.76  
2.74  
2.74  
2.73  
2.73  
2.71  
2.53  
2.50  
2.50  
2.47  
1.32  
1.30  
1.28

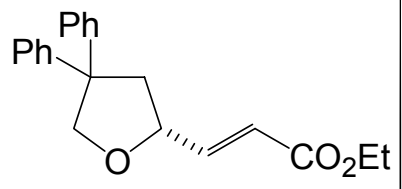

**Table 2, entry 3**

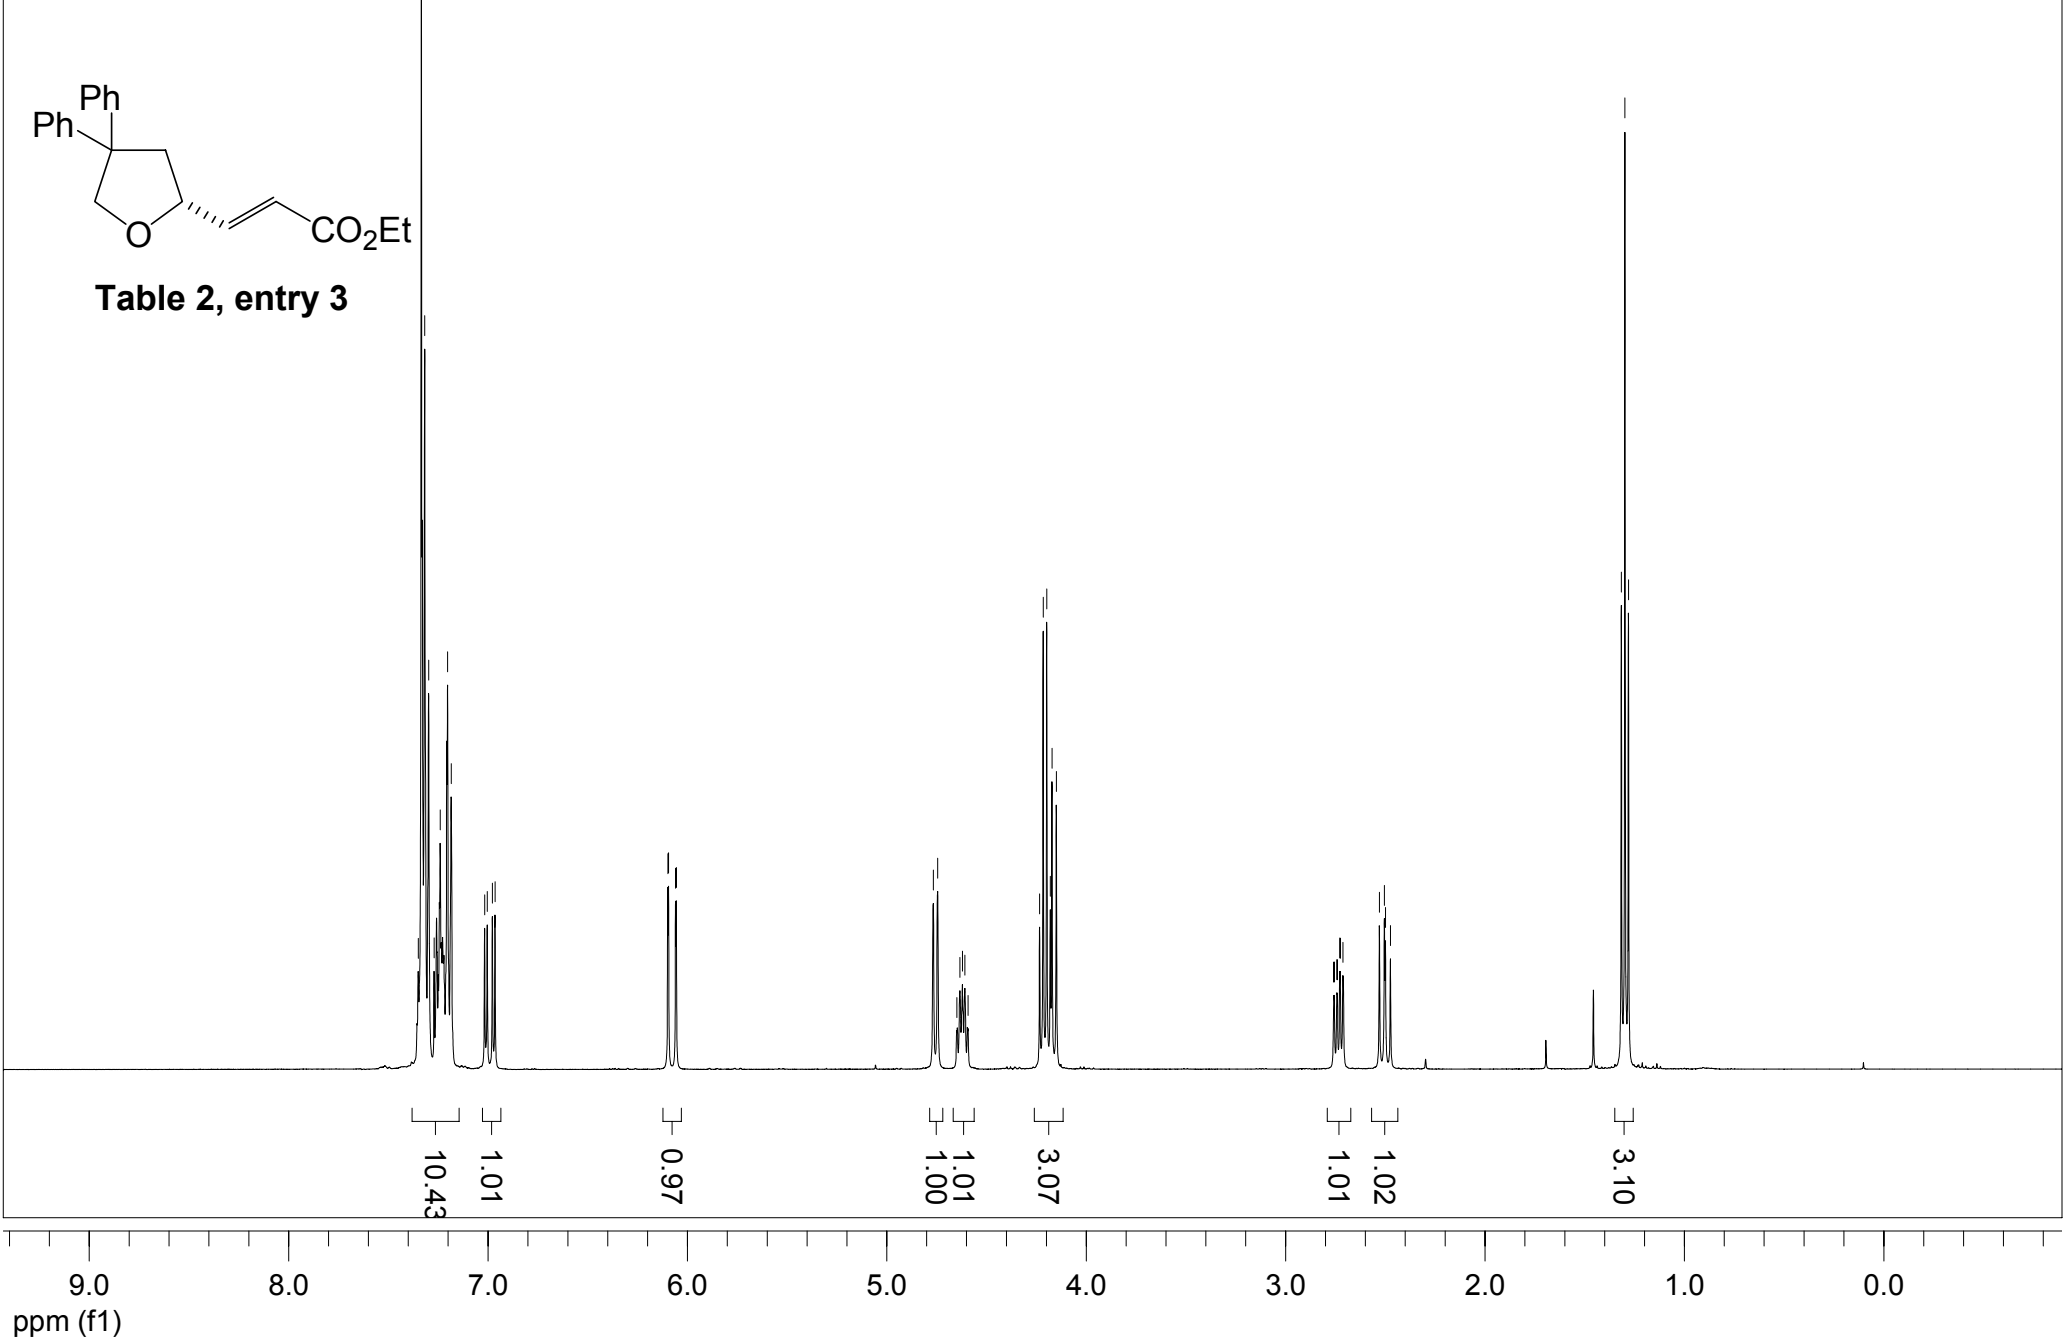

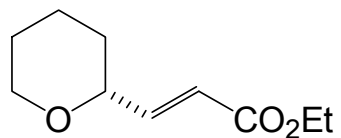

Table 2, entry 4

7.27  
6.90  
6.89  
6.86  
6.85  
6.02  
6.01  
5.98  
5.97  
4.20  
4.18  
4.17  
4.15  
4.05  
4.04  
4.02  
4.01  
3.97  
3.96  
3.94  
3.92  
3.51  
3.51  
3.49  
3.48  
3.45  
3.45  
1.89  
1.88  
1.86  
1.85  
1.85  
1.73  
1.70  
1.69  
1.61  
1.55  
1.54  
1.49  
1.39  
1.33  
1.32  
1.30  
1.28  
1.26  
1.25

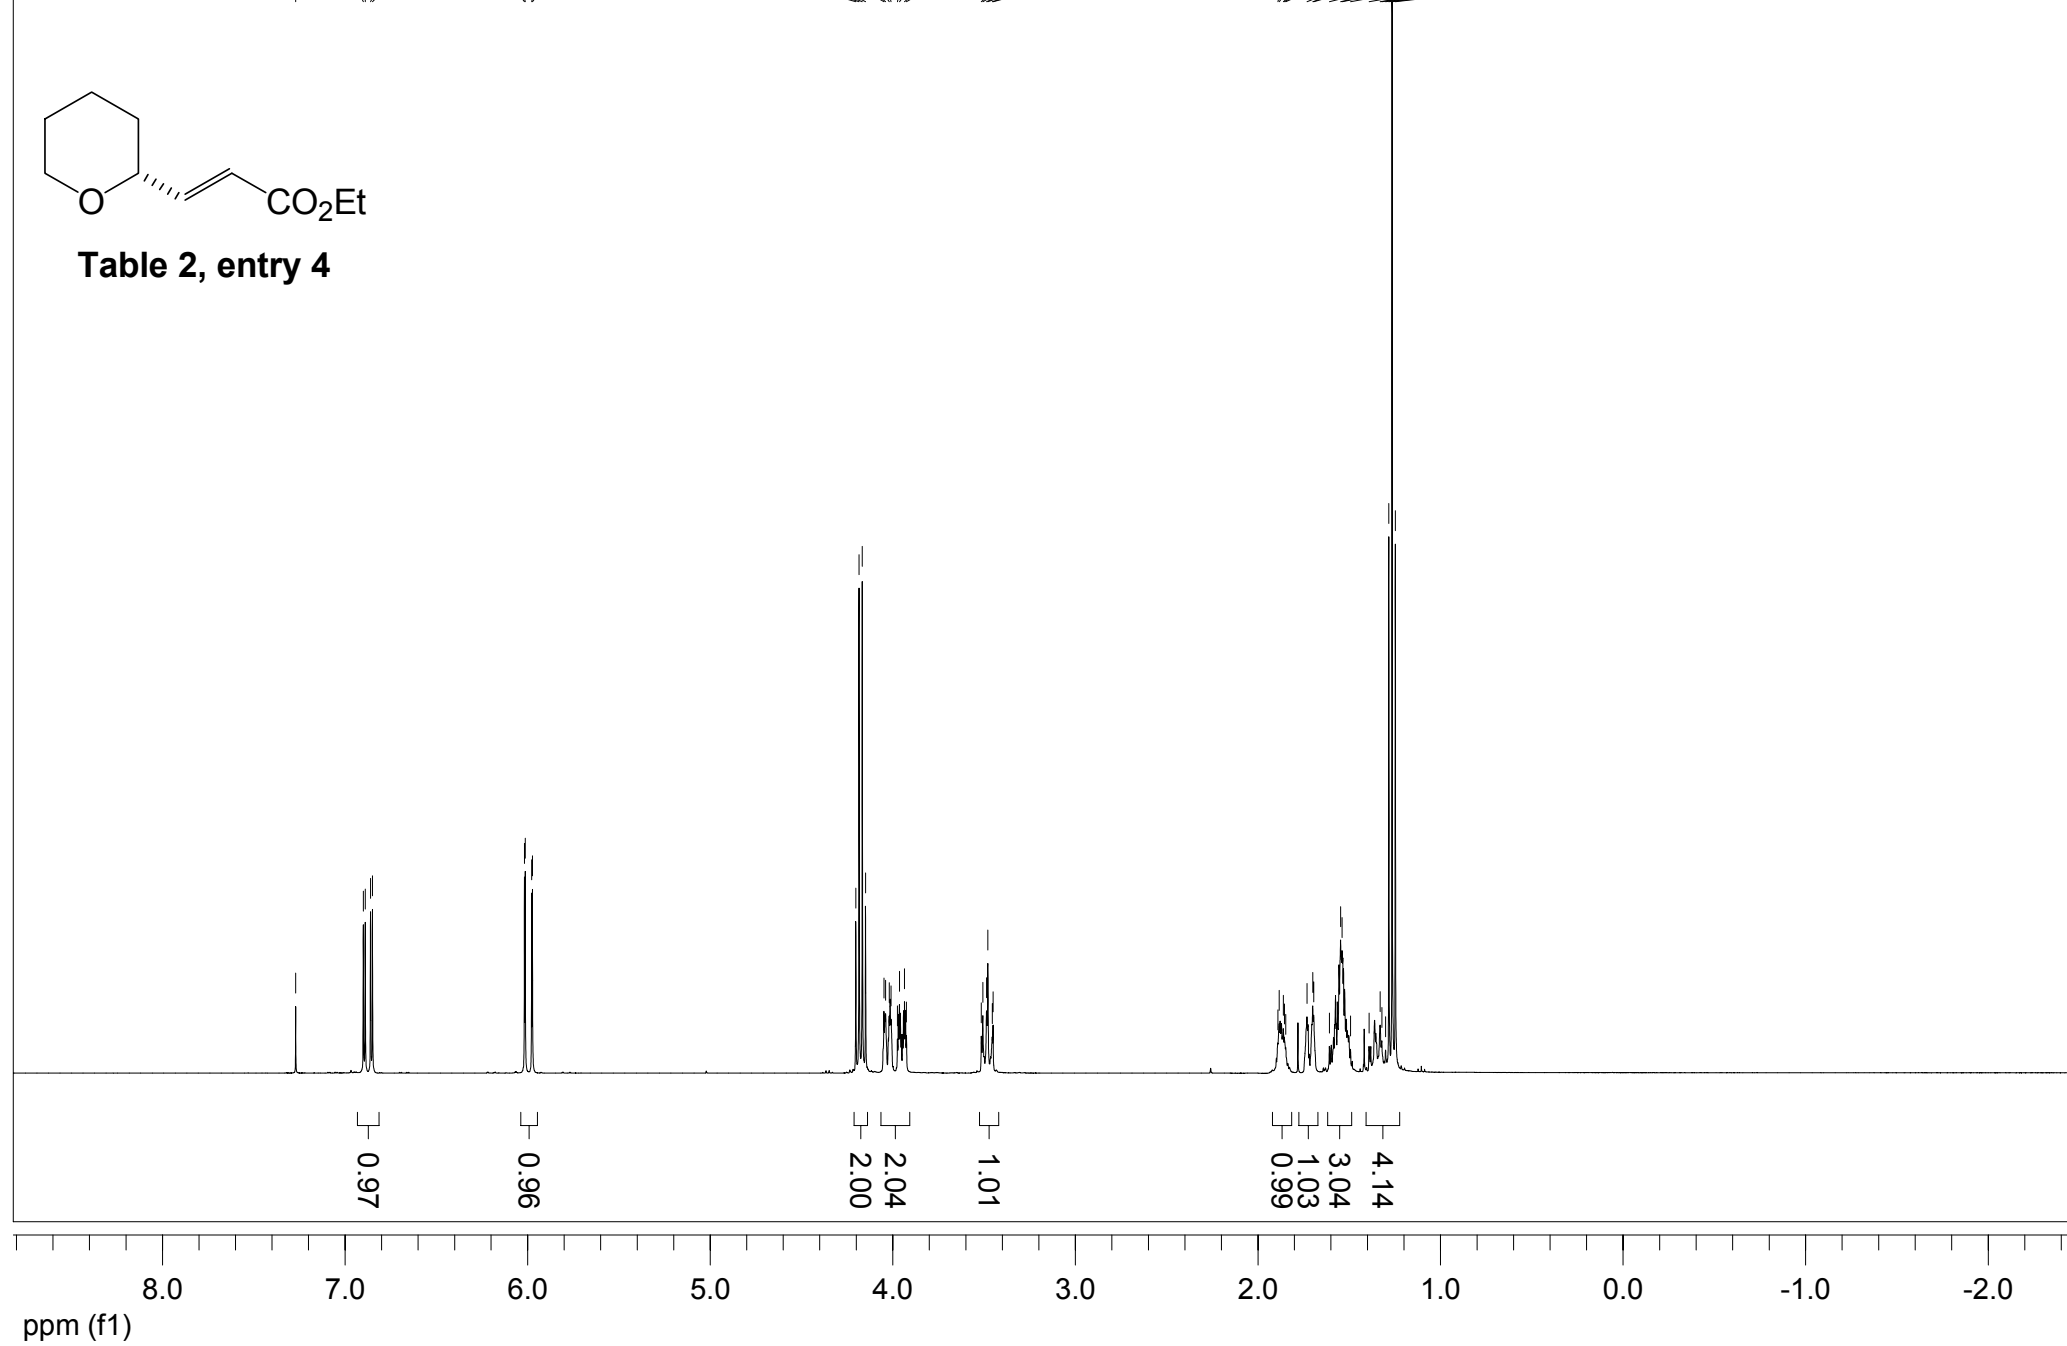

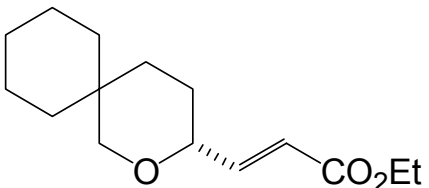

**Table 2, entry 5**

7.27  
6.94  
6.93  
6.90  
6.89  
6.05  
6.04  
6.01  
6.00  
4.21  
4.20  
4.18  
4.16  
3.92  
3.91  
3.91  
3.90  
3.90  
3.89  
3.89  
3.88  
3.83  
3.83  
3.80  
3.80  
3.16  
3.13  
1.82  
1.81  
1.79  
1.78  
1.57  
1.55  
1.54  
1.54  
1.42  
1.42  
1.29  
1.28  
1.26  
1.16  
1.15  
1.14

1.02

1.00

2.12

2.09

1.05

1.02

11.00

2.08

9.11

ppm (f1)

8.0

7.0

6.0

5.0

4.0

3.0

2.0

1.0

0.0

-1.0

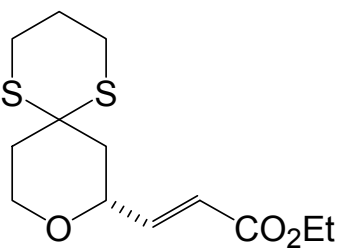

**Table 2, entry 6**

7.27  
6.88  
6.87  
6.85  
6.84  
6.08  
6.07  
6.04  
6.03

4.45  
4.43  
4.42  
4.40  
4.22  
4.20  
4.18  
4.17  
3.96  
3.88

2.97  
2.75  
2.39  
2.38  
2.38  
2.35  
2.35  
2.34  
2.17  
2.17  
2.14  
2.13  
2.06  
1.99  
1.93  
1.74  
1.71  
1.71  
1.68  
1.30  
1.28  
1.26

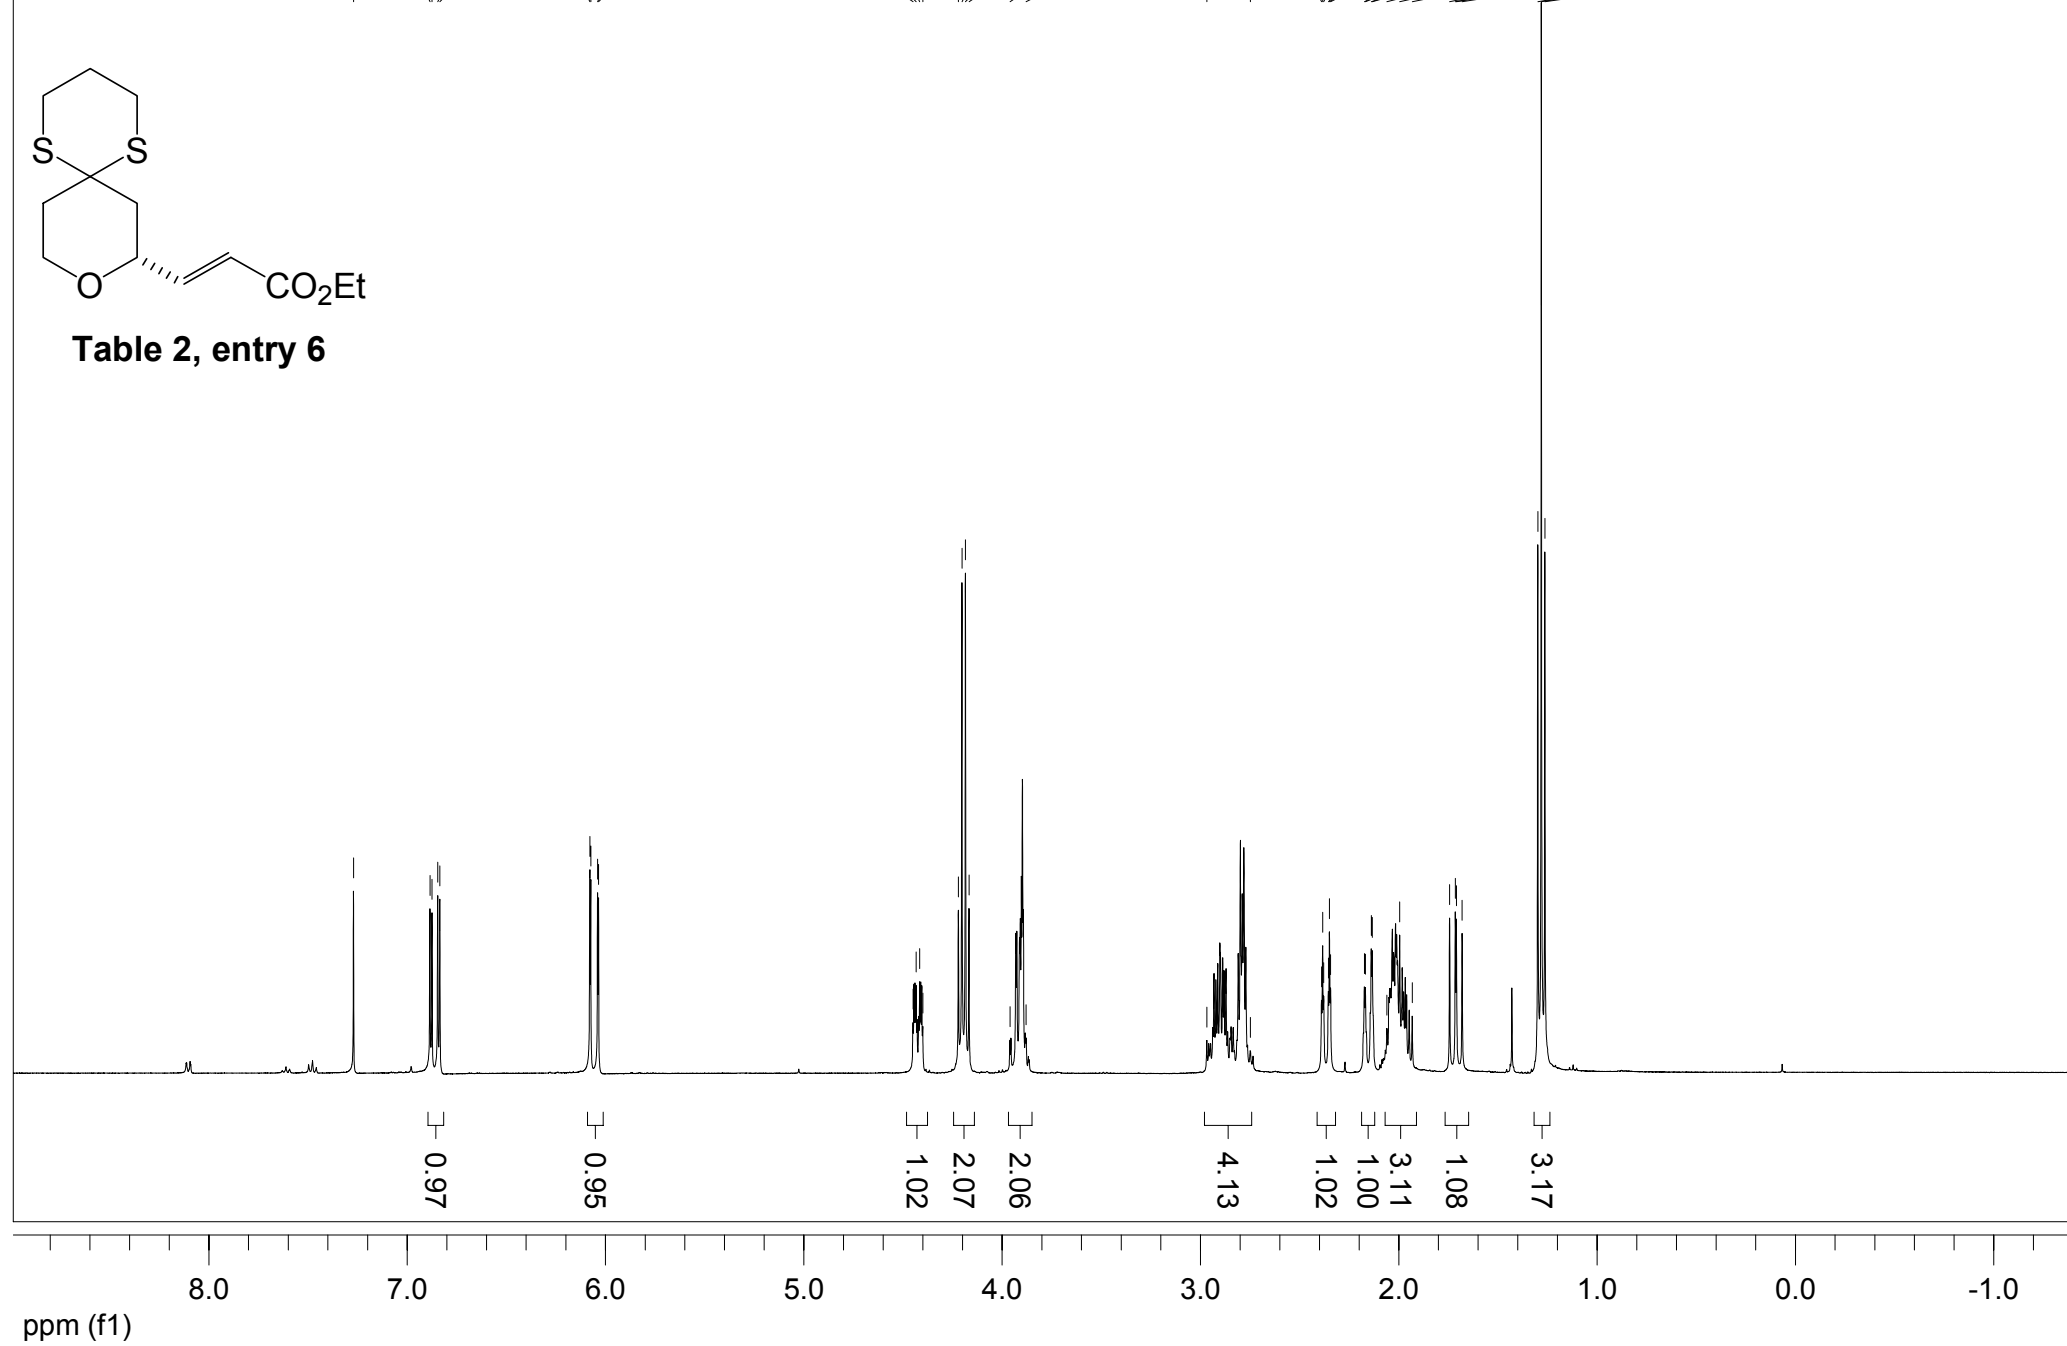



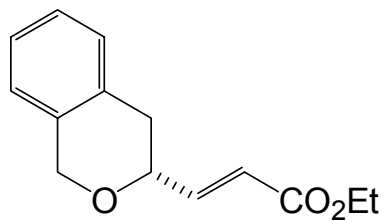

Table 2, entry 7

7.27  
7.21  
7.19  
7.14  
7.08  
7.02  
6.19  
6.19  
6.15  
6.15  
4.96  
4.92  
4.90  
4.86  
4.41  
4.39  
4.38  
4.36  
4.36  
4.26  
4.24  
4.22  
4.21  
2.86  
2.85  
1.33  
1.32  
1.30

5.00

0.95

2.02

1.00  
2.00

2.01

3.03

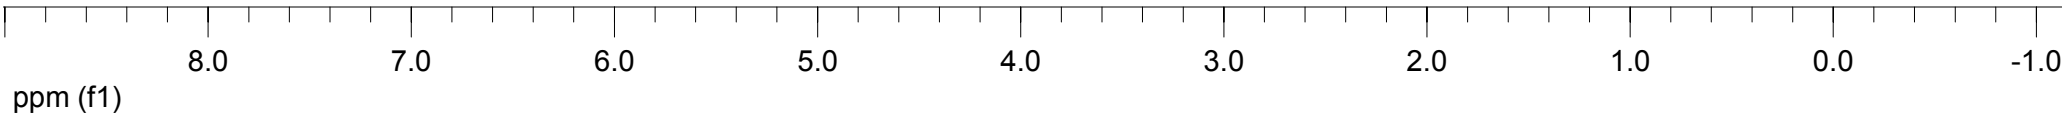

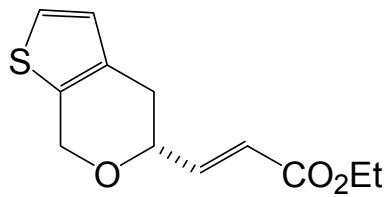

Table 2, entry 8

7.27  
7.19  
7.18  
7.07  
7.06  
7.03  
7.02  
6.83  
6.82  
6.19  
6.19  
6.15  
6.15  
5.01  
4.98  
4.92  
4.88  
4.38  
4.37  
4.35  
4.34  
4.33  
4.26  
4.24  
4.22  
4.20  
2.84  
2.83  
2.80  
2.79  
2.72  
2.70  
2.67  
2.65  
1.33  
1.31  
1.29

56.0  
26.0  
26.0  
56.0  
10.7  
66.0  
66.0  
10.1  
10.1  
00.0

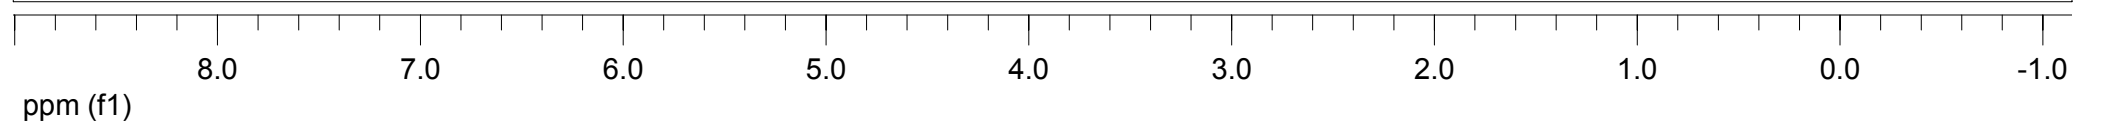

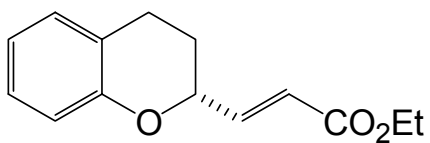

Table 3, entry 1

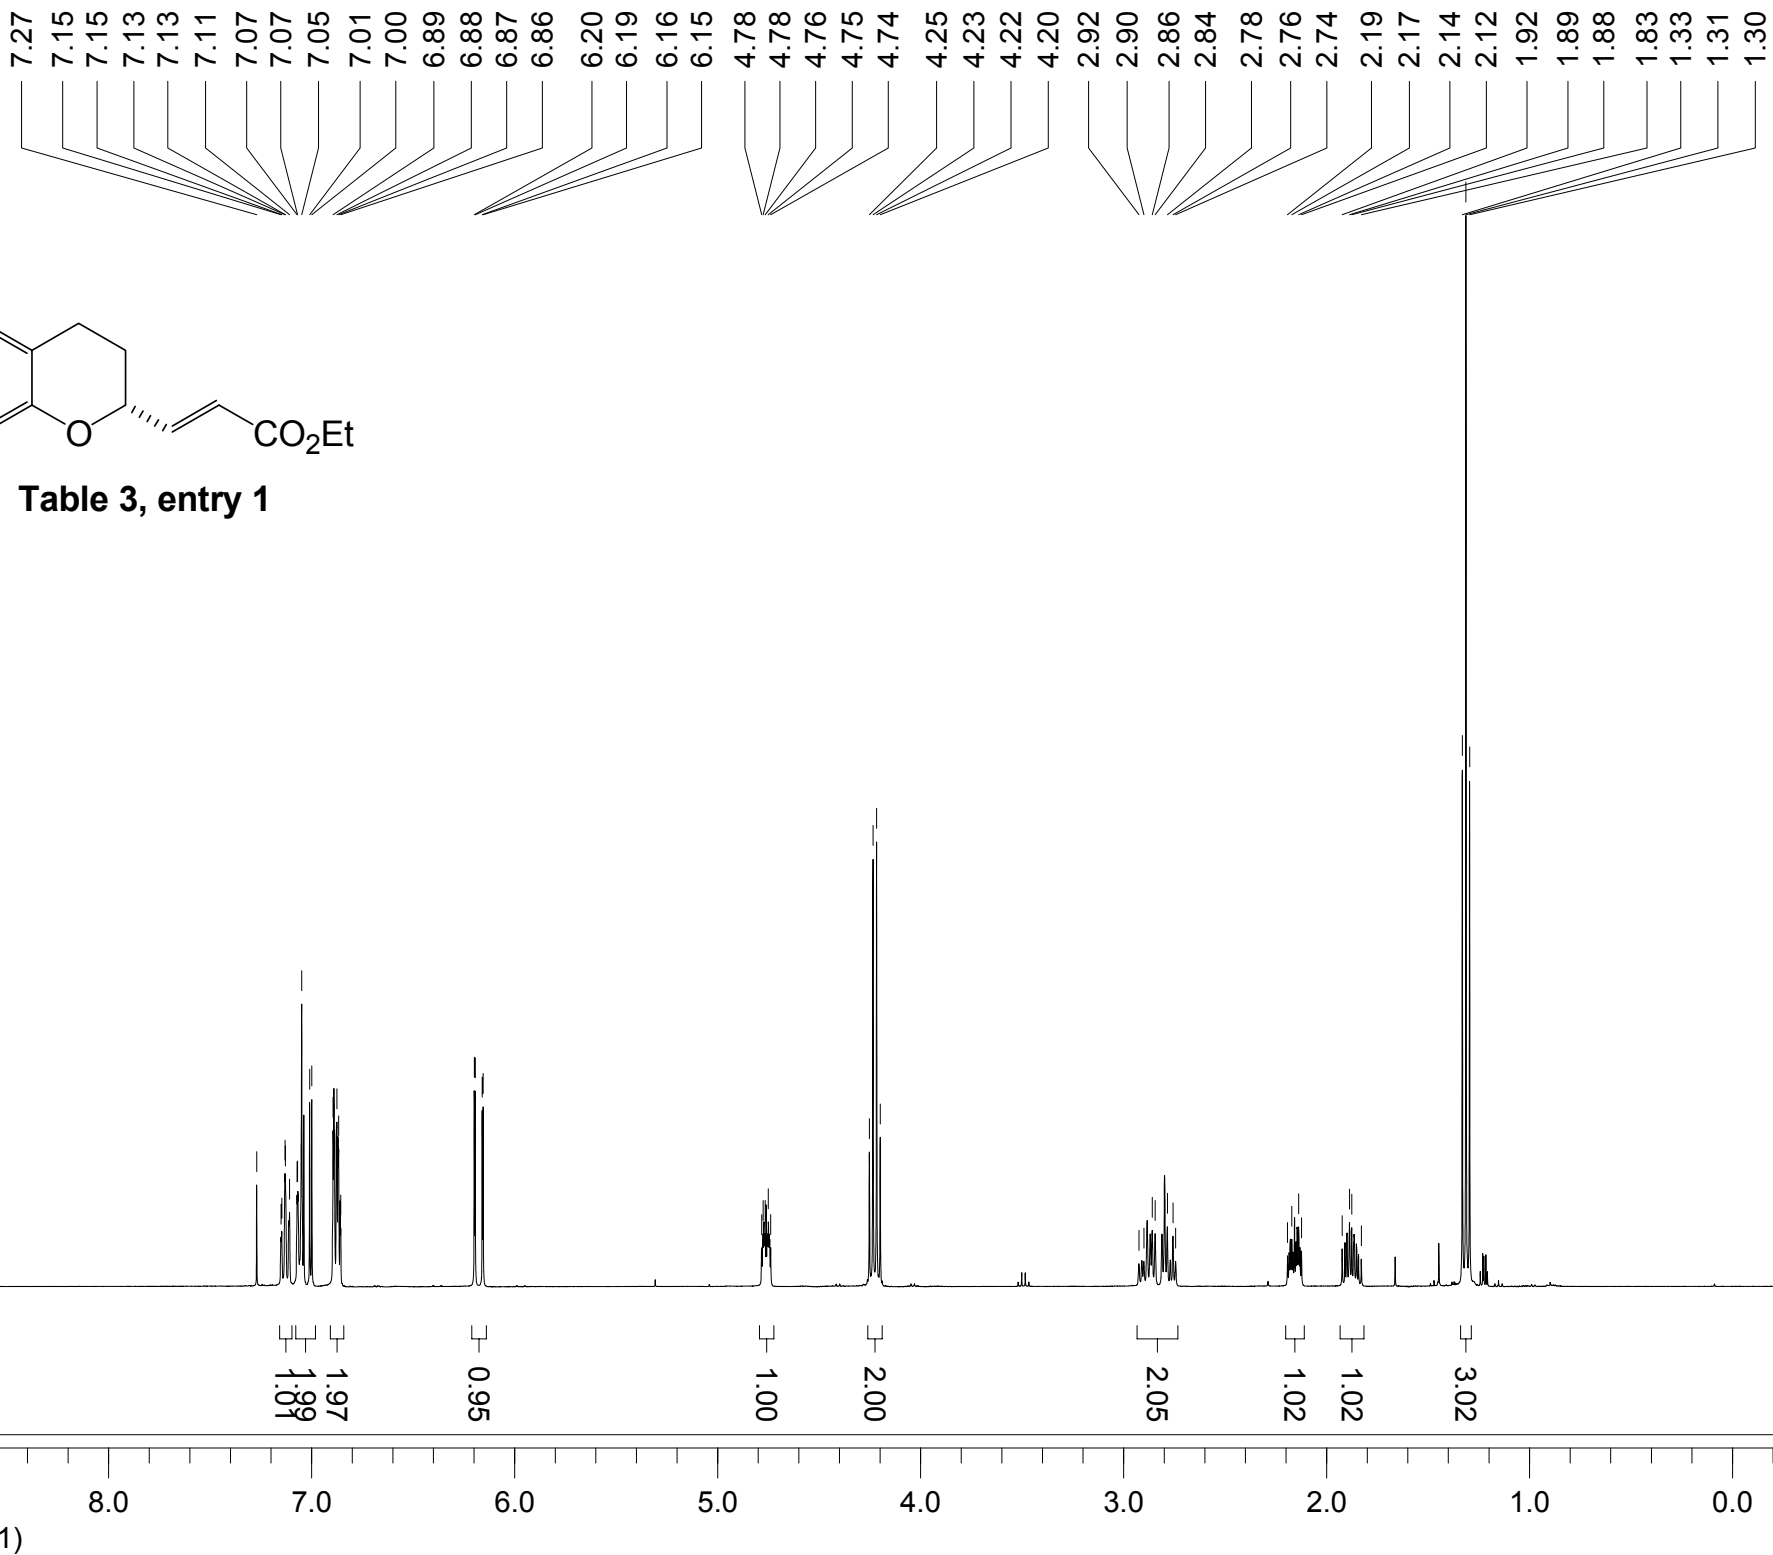

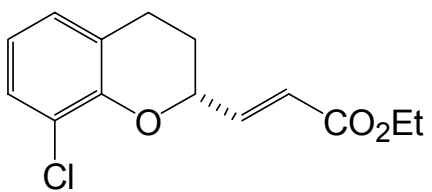

Table 3, entry 2

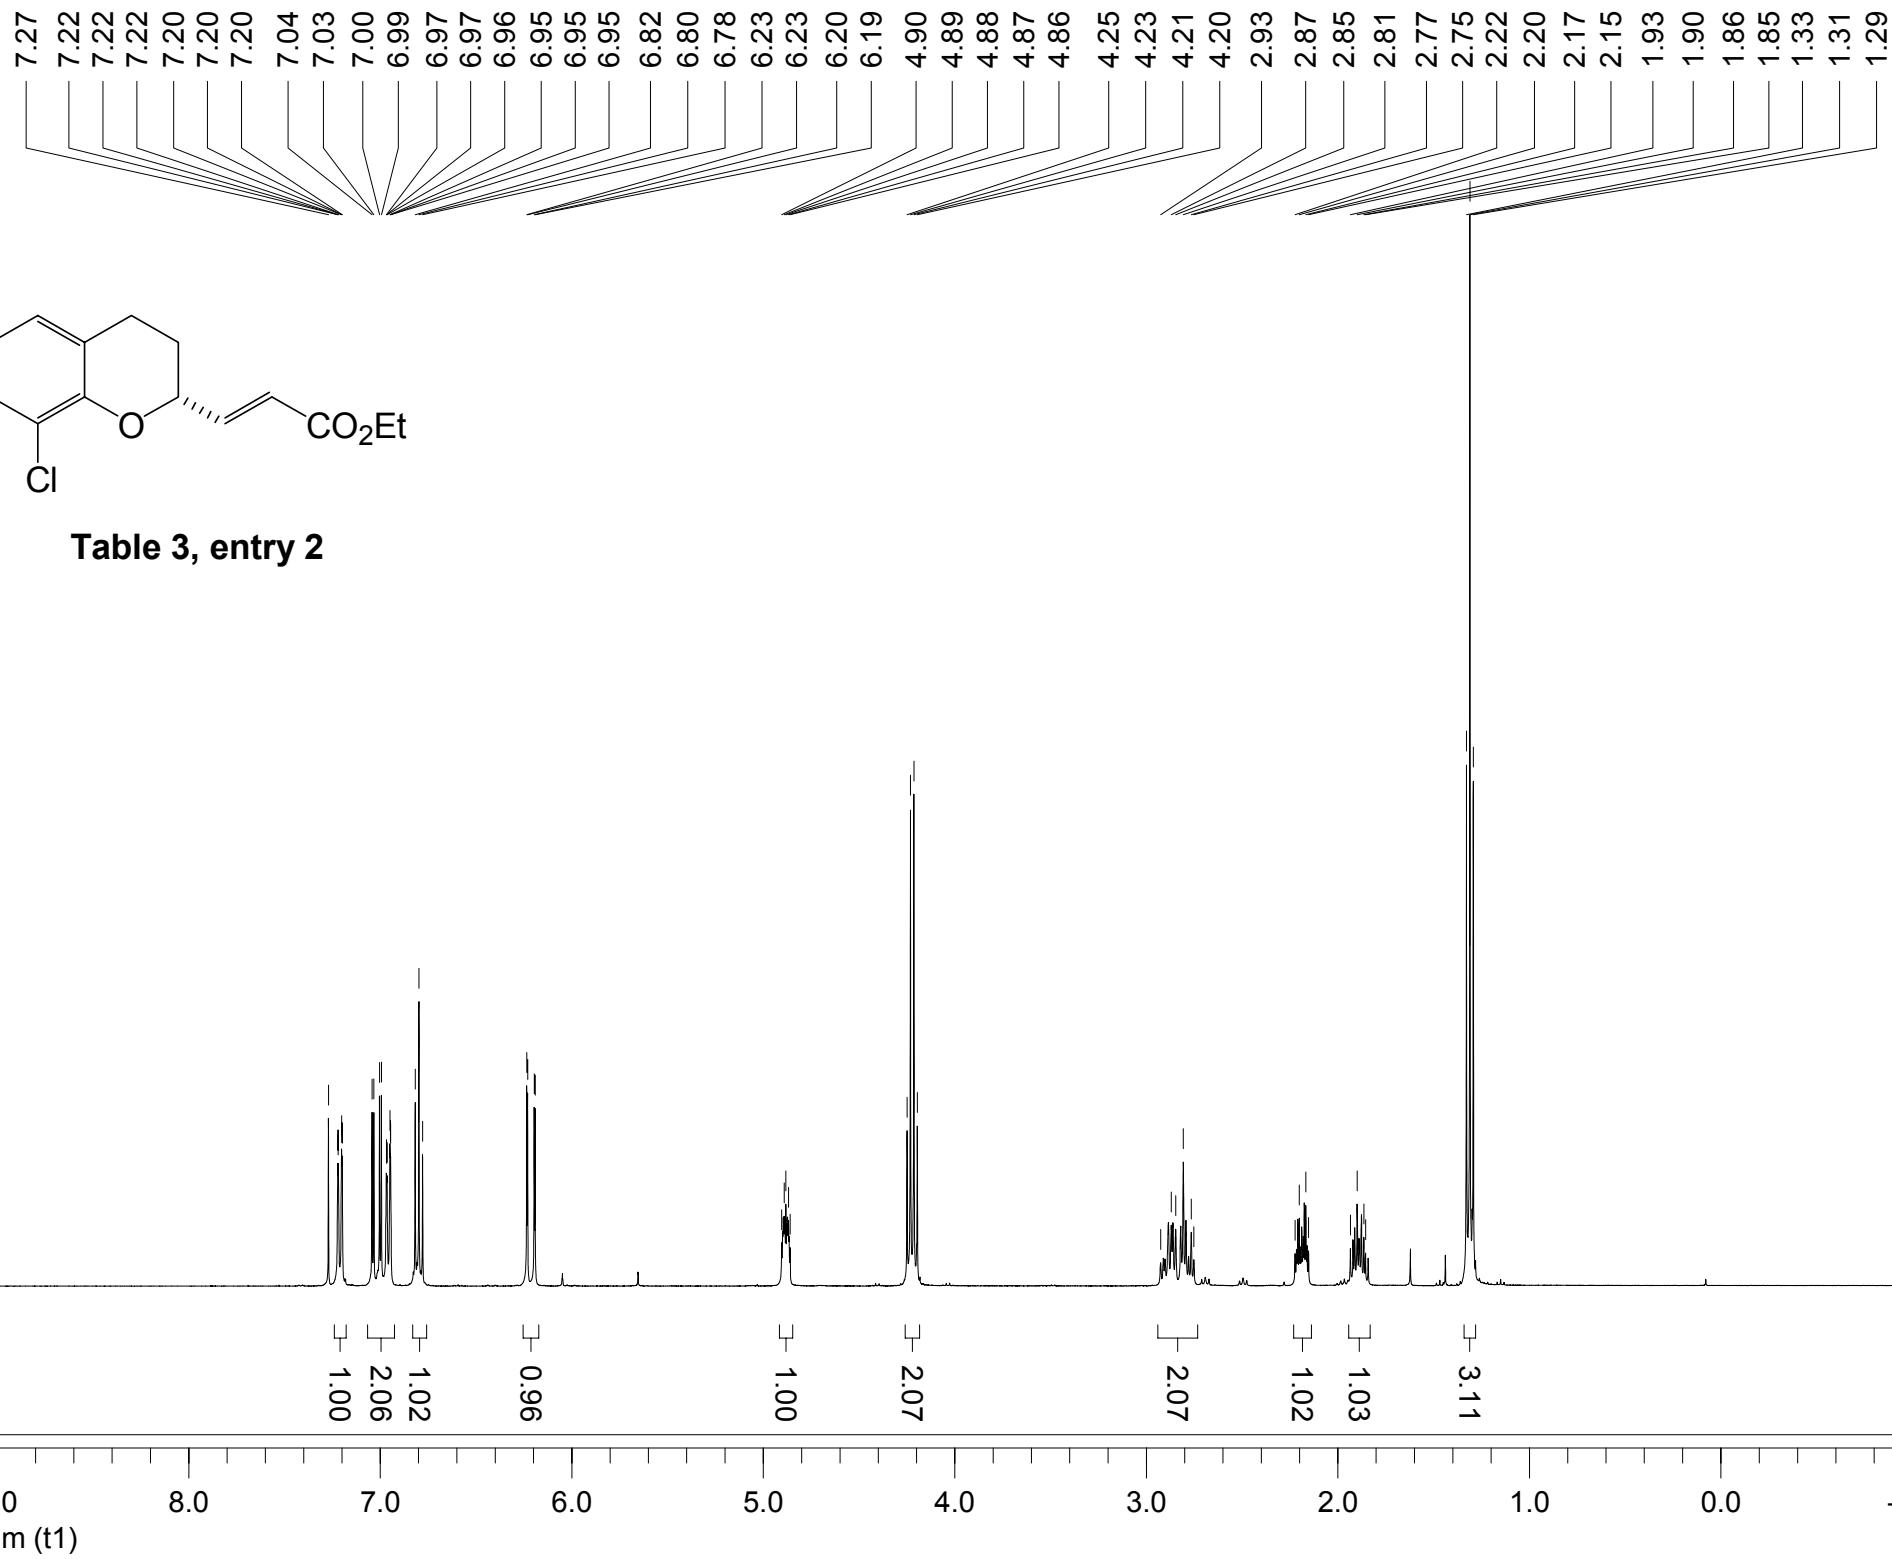

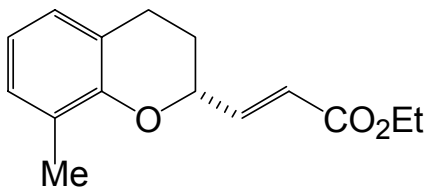

Table 3, entry 3

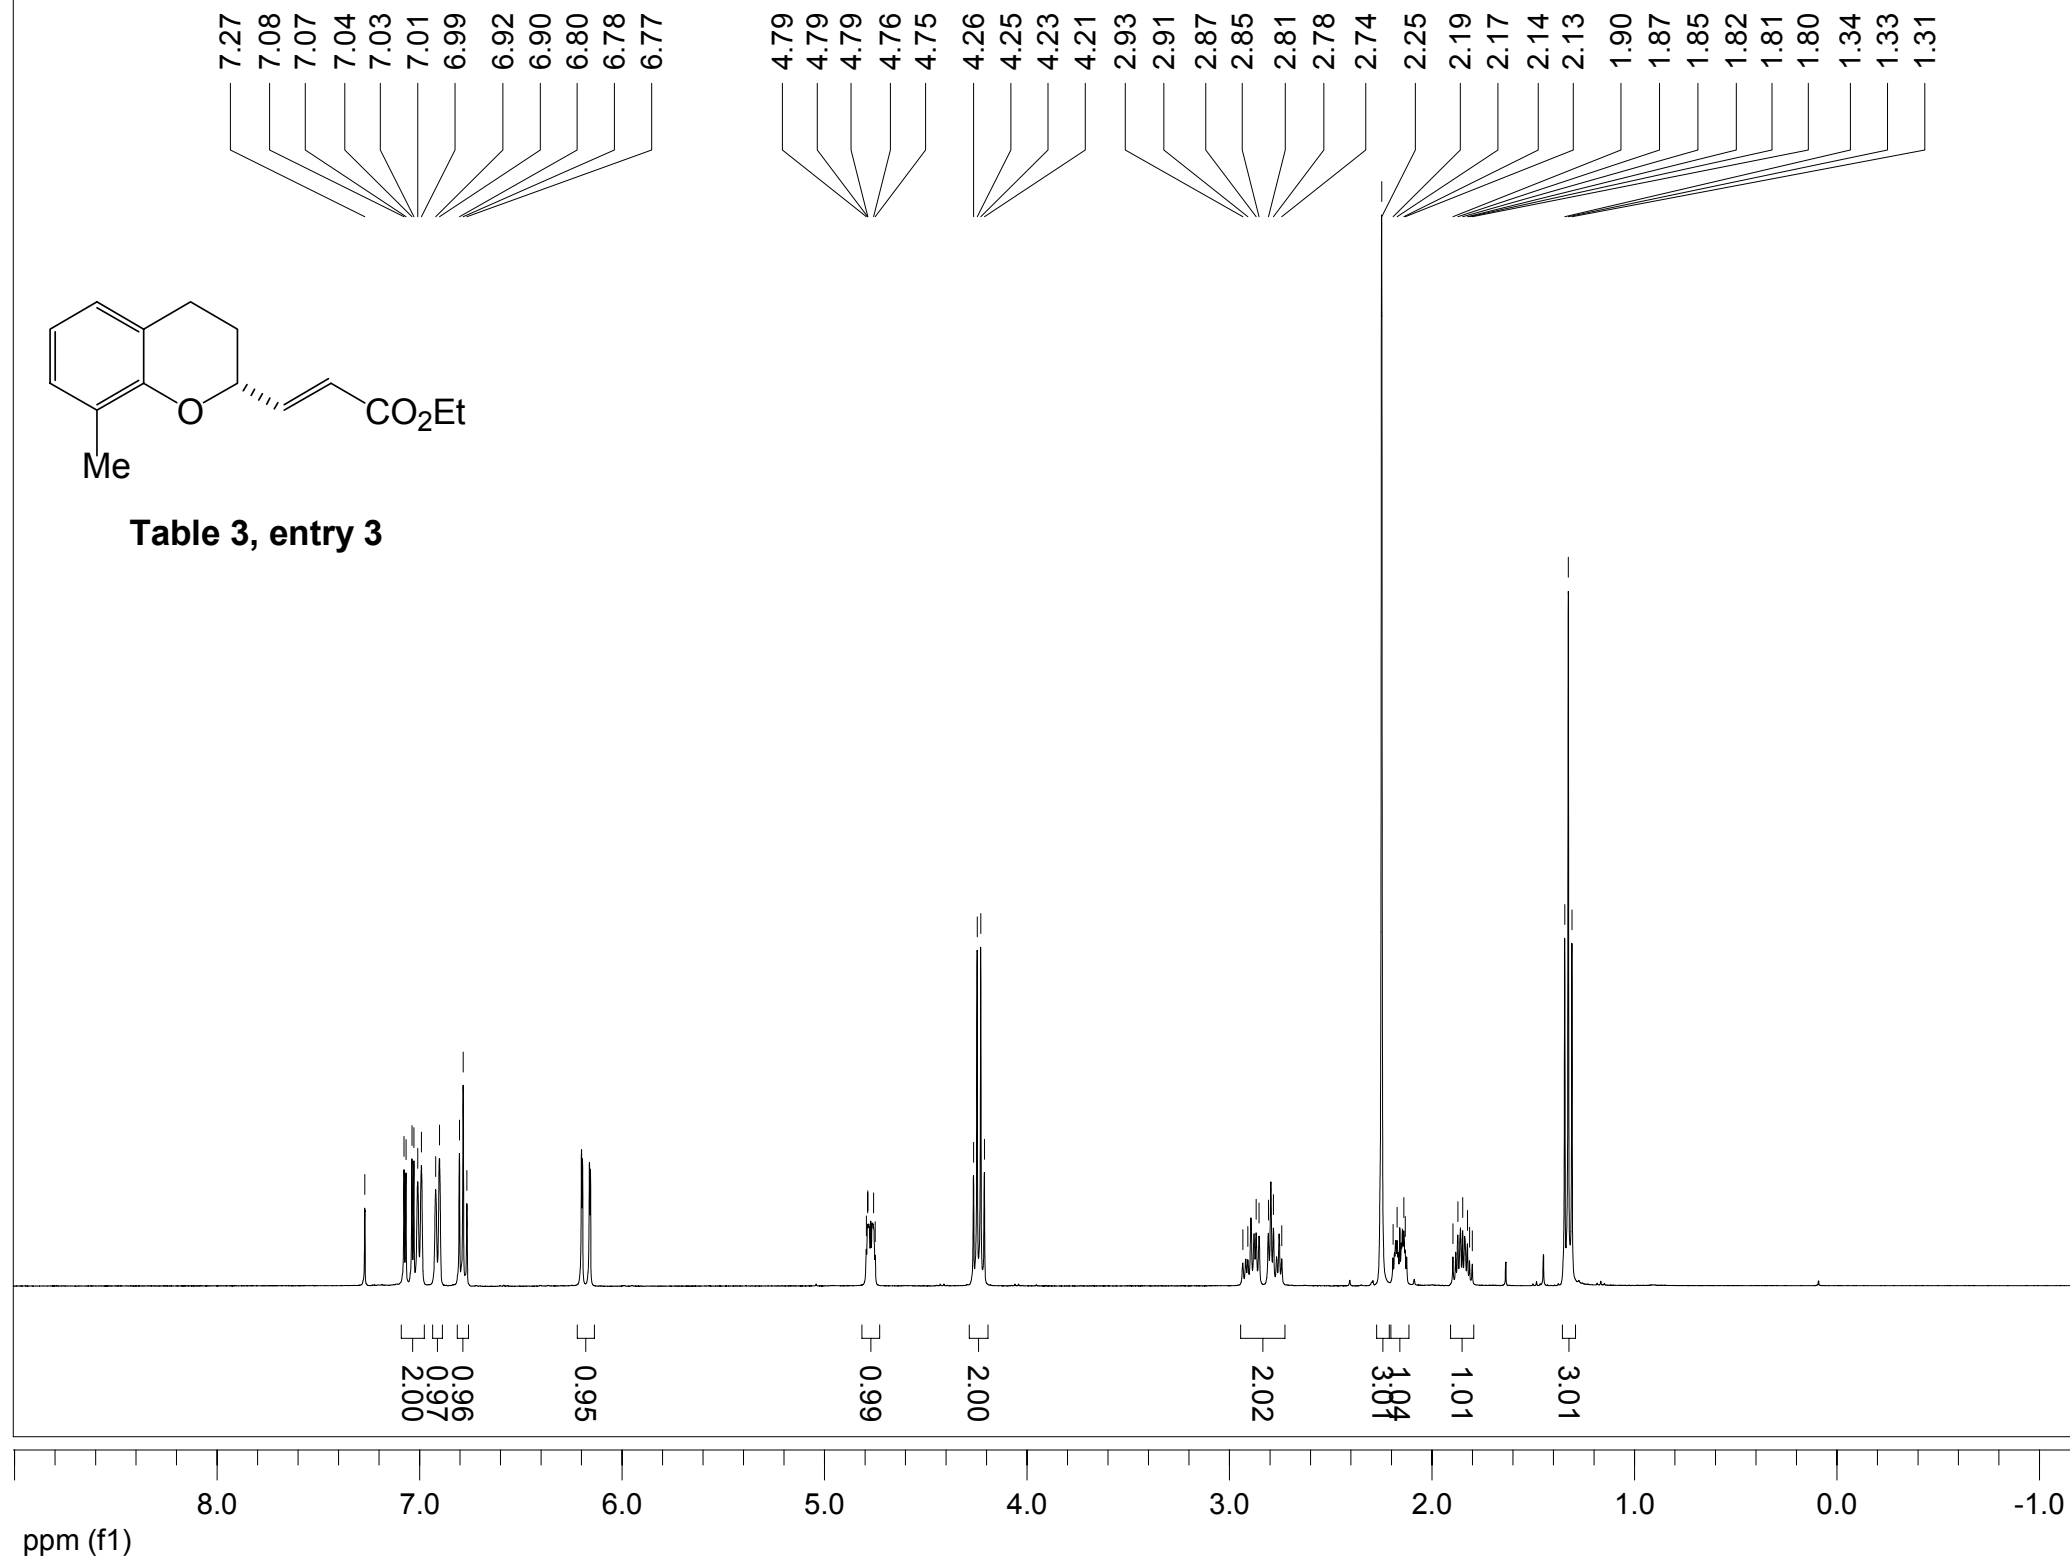

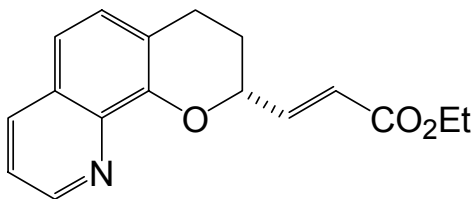

Table 3, entry 4

8.95  
8.94  
8.93  
8.93  
8.11  
8.10  
8.09  
8.08  
7.41  
7.40  
7.39  
7.38  
7.34  
7.32  
7.27  
7.23  
7.21  
7.15  
7.14  
7.11  
7.10  
6.16  
6.16  
6.12  
6.12  
5.20  
5.16  
4.22  
4.18  
4.14  
3.00  
2.94  
2.87  
2.32  
2.25  
2.15  
2.12  
2.07  
1.28  
1.27  
1.25

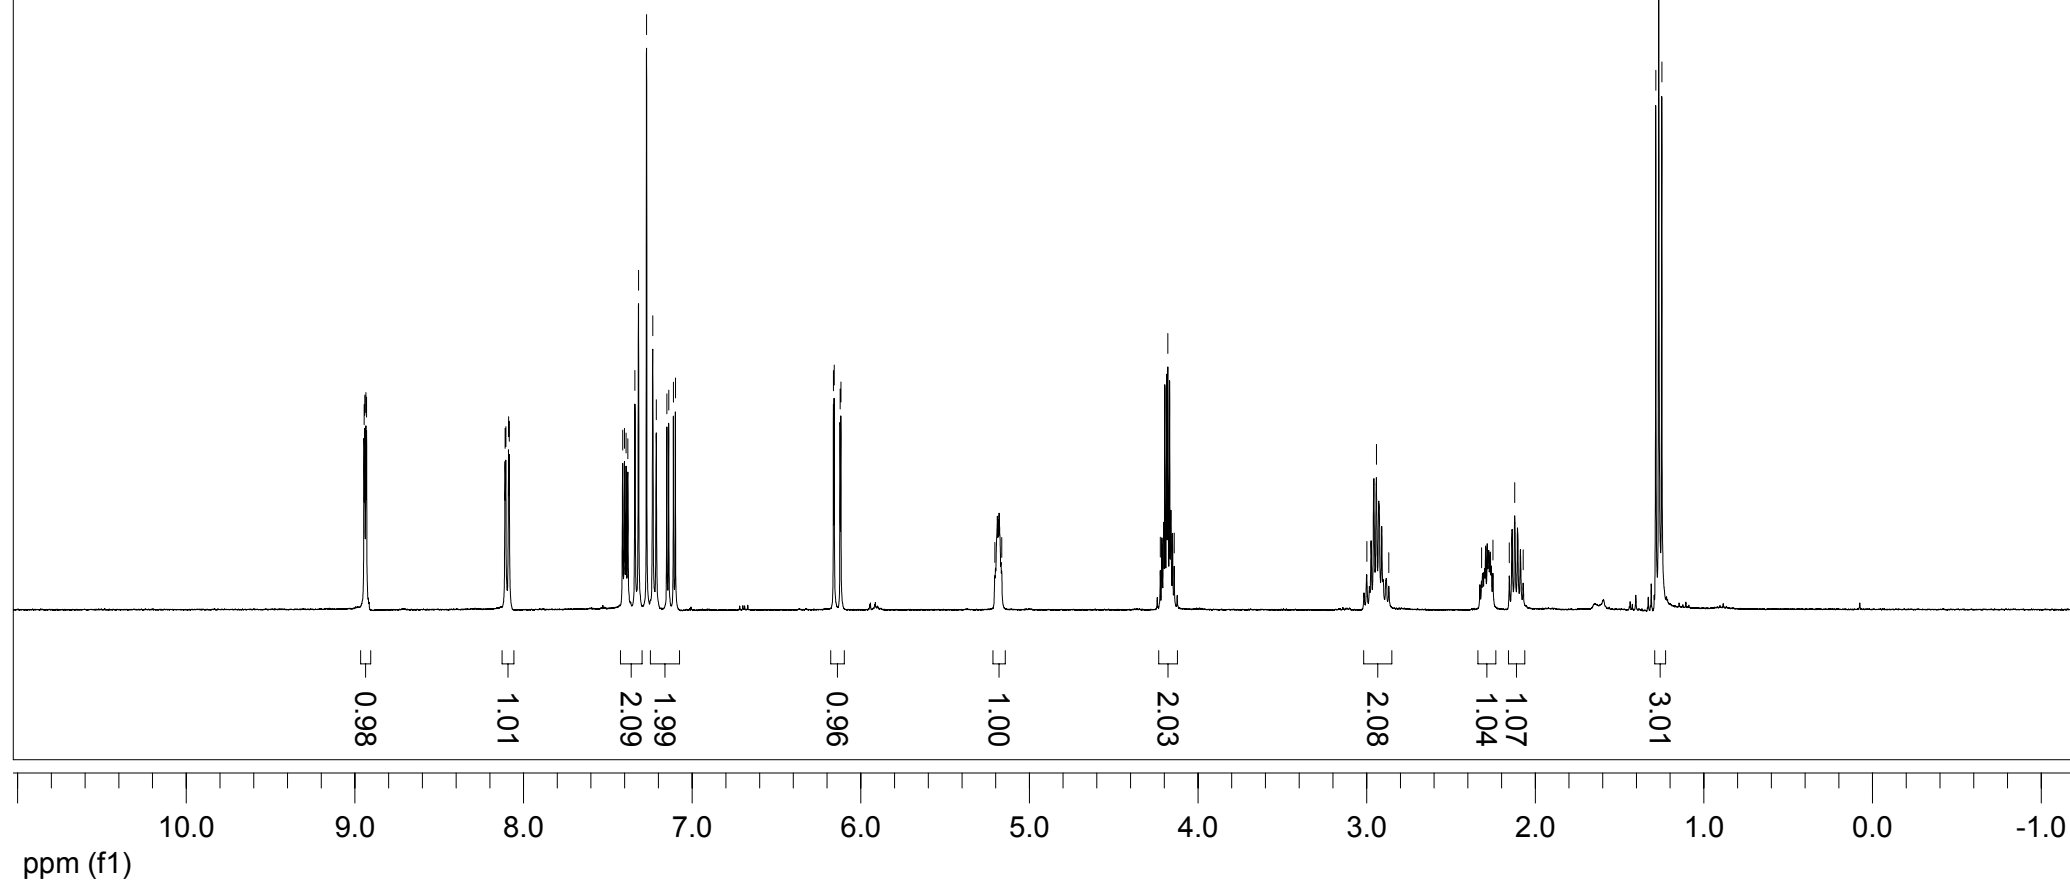

Supplement: NIHMS102361-supplement.pdf [file NIHMS102361-supplement.pdf]
